# Robust effects of cortical feedback on thalamic firing mode during naturalistic stimulation

Martin A. Spacek<sup>a,\*</sup>, Gregory Born<sup>a,b</sup>, Davide Crombie<sup>a,b</sup>, Steffen Katzner<sup>a,1</sup>, Laura Busse<sup>a,c,1,\*</sup>

<sup>a</sup>*Division of Neurobiology, Department Biology II, LMU Munich, Munich, Germany*

<sup>b</sup>*Graduate School of Systemic Neuroscience, LMU Munich, Munich, Germany*

<sup>c</sup>*Bernstein Centre for Computational Neuroscience, Munich, Germany*

---

## Abstract

Neurons in the dorsolateral geniculate nucleus (dLGN) of the thalamus are contacted by a large number of feedback synapses from cortex, whose role in visual processing is poorly understood. Past studies investigating this role have mostly used simple visual stimuli and anesthetized animals, but corticothalamic (CT) feedback might be particularly relevant during processing of complex visual stimuli, and its effects might depend on behavioral state. Here, we find that CT feedback robustly modulates responses to naturalistic movie clips by increasing response gain and promoting tonic firing mode. Compared to these robust effects for naturalistic movies, CT feedback effects were less consistent for simple grating stimuli. Finally, while CT feedback and locomotion affected dLGN responses in similar ways, we found their effects to be largely independent. We propose that CT feedback and behavioral state use separate routes to powerfully modulate visual information on its way to cortex.

*Keywords:* primary visual cortex, lateral geniculate nucleus, feedback, naturalistic movies, locomotion, behavioral state, tonic mode, burst mode

---

## Introduction

Mammalian vision is based on a hierarchy of processing stages that are connected by feedforward circuits projecting from lower to higher levels, and by feedback circuits projecting from higher to lower levels. Feedforward processing is thought to create feature selectivity [1, 2] and invariance to translation, scale, or rotation [2–5], to ultimately enable object recognition [6]. Hypotheses about the functional role of feedback circuits include top-down attention, working memory, prediction, and awareness [7–12]. Compared to theories of feedforward processing, however, there is little consensus on the specific function of feedback connections [13, 14].

Feedback in the visual system targets brain areas as early as the dorsolateral geniculate nucleus (dLGN) of the thalamus, where up to 30% of synaptic connections onto relay cells are established by corticothalamic (CT) feedback [15]. Direct corticogeniculate feedback is

---

\*Correspondence: nature@mspacek.mm.st (MAS), busse@bio.lmu.de (LB)

<sup>1</sup>Senior authors

23 thought to arise from V1 layer 6 (L6) CT pyramidal cells [16, 17], whose role in visual pro-  
24 cessing has remained elusive for a number of reasons. L6 CT pyramidal cells have notoriously  
25 low firing rates [18–23] and their deep location within cortex makes them a difficult target for  
26 *in-vivo* single cell functional imaging [24] and cell-type specific manipulations using optoge-  
27 netics [25]. L6 CT pyramidal cells are also challenging to identify in extracellular recordings  
28 due to the heterogeneity of L6 neurons [16]. The action of CT feedback on dLGN activity  
29 is generally considered modulatory rather than driving [26], as CT feedback inputs contact  
30 the distal dendrites of relay cells via mGluR1 metabotropic receptors [27], implying rather  
31 slow and long-lasting effects on dLGN processing. Since L6 CT pyramidal cells provide both  
32 direct excitation and indirect inhibition of dLGN via the thalamic reticular nucleus (TRN)  
33 and dLGN inhibitory interneurons [17, 28], the effects of CT feedback are expected to be  
34 complex [29].

35 Despite the massive number of CT inputs to dLGN, the functional impact of corticogenicu-  
36 lulate feedback remains unclear [30, 31]. In the literature, diverse methods of manipulation  
37 with different temporal scales, specificity and overall sign (activation vs. suppression), have  
38 yielded diverse and even conflicting results. CT feedback, for instance, has been shown to  
39 modulate geniculate spatial integration [32–39], temporal processing [37, 40], response gain  
40 [38, 41–43], and transitions between tonic and burst firing modes [44, 45]. Other studies,  
41 however, found that manipulation of CT feedback did not change some or any of these dLGN  
42 response properties [25, 37, 46–48].

43 Most of these previous studies have probed the effects of CT feedback with artificial  
44 stimuli, and mostly in anesthetized animals; CT feedback, however, might be most relevant  
45 for processing of dynamic naturalistic information and during wakefulness. Indeed, it has  
46 previously been suggested that corticogeniculate feedback might be more engaged for mov-  
47 ing compared to stationary stimuli [17], and for complex dynamic noise textures than simple  
48 moving bars [49], consistent with a potential role in figure-ground processing [50]. Further-  
49 more, since the responsiveness of feedback projections [51], including those originating from  
50 V1 corticogeniculate neurons [31], seem to be affected by anesthesia, CT feedback effects  
51 should be more evident in alert compared to anesthetized animals.

52 Here, we recorded spiking activity in dLGN of awake mice and investigated how CT feed-  
53 back affected dLGN responses to naturalistic movie clips. In order to achieve reliable, tem-  
54 porally precise, and reversible suppression of CT feedback, we conditionally expressed chan-  
55 nelrhodopsin2 (ChR2) in V1 parvalbumin-positive (PV+) inhibitory interneurons, whose  
56 activation can reliably suppress cortical output [41, 52]. We found that V1 suppression had  
57 consistent modulatory effects on dLGN responses to movie clips, which could be captured by  
58 divisive transformations. Effects of CT feedback on dLGN responses to grating stimuli were  
59 more diverse, likely because their periodicity interacted with mechanisms controlling dLGN  
60 firing mode. Finally, while geniculate responses during CT feedback suppression resembled  
61 those during low arousal, we found effects of CT feedback and behavioral state to be largely  
62 independent. Overall, our results demonstrate that visual information en route to cortex can  
63 be reliably modulated by extra-retinal influences such as cortical feedback and locomotion,  
64 which are likely conveyed via different modulatory pathways.

## 65 Results

### 66 *CT feedback modulates dLGN responses to naturalistic movie clips*

67 To investigate the impact of CT feedback on naturalistic vision we showed head-fixed mice  
68 short movie clips, and compared responses of dLGN neurons during optogenetic suppression  
69 of V1 activity to a control condition with CT feedback left intact (**Fig. 1**). The responses of  
70 individual dLGN neurons to naturalistic movie clips were characterized by distinct response  
71 events that were narrow in time and reliable across trials (**Fig. 1d, top**, example neuron).  
72 Consistent with the notion that CT feedback has a modulatory rather than driving role [53],  
73 even during V1 suppression the temporal response pattern remained discernible (Pearson  
74 correlation  $r = 0.54$ ,  $p < 10^{-6}$ , **Fig. 1d,e**). Yet, as illustrated in the example neuron, with  
75 CT feedback intact, firing rates were higher and burst spikes were less frequent (**Fig. 1e**,  
76 **left**). As a consequence, the distributions of instantaneous firing rates in the two conditions  
77 were significantly different (KS test,  $p < 10^{-6}$ ), and were more skewed during V1 suppression  
78 than with CT feedback intact ( $\gamma = 2.02$  vs.  $1.22$ ; **Fig. 1e, right**).

79 We observed similar effects in the recorded population of dLGN neurons, where CT  
80 feedback enhanced overall responses and promoted tonic mode firing. Indeed, while mean  
81 firing rates varied  $\sim 4$  orders of magnitude across the population, they were higher with  
82 CT feedback intact than with feedback suppressed (13.6 vs. 10.9 spikes/s; linear multilevel-  
83 model (LMM):  $F_{1,162.8} = 12.21$ ,  $p = 0.00061$ ; **Fig. 1f**). In addition, CT feedback also  
84 influenced more fine-grained properties of geniculate responses. First, with CT feedback,  
85 the mean proportion of spikes occurring as part of a burst event was about half of what we  
86 observed during suppression (0.051 vs 0.093; LMM:  $F_{1,172.8} = 44.3$ ,  $p = 3.7 \times 10^{-10}$ ; **Fig. 1g**).  
87 Second, consistent with the distributions of firing rate for the example neuron (**Fig. 1e**,  
88 **right**) and related to the relative increase of responsiveness in the population (**Fig. S2c**),  
89 responses to the naturalistic movie clips with CT feedback intact were, on average, less sparse  
90 (0.37 vs. 0.46; LMM:  $F_{1,169.21} = 51.89$ ,  $p = 1.8 \times 10^{-11}$ ; **Fig. 1h**), indicating that neurons  
91 fired less selectively across the frames of the movie. Finally, we also examined the effect  
92 of CT feedback on response reliability. To quantify reliability, we computed the Pearson  
93 correlation coefficient of a neuron's responses between each pair of the 200 stimulus repeats  
94 per condition, and averaged the correlation coefficients over all pair-wise combinations [55].  
95 With CT feedback intact, mean response reliability was lower than without feedback (0.17  
96 vs. 0.19; LMM:  $F_{1,169.73} = 15.2$ ,  $p = 0.00014$ ; **Fig. 1i**). Importantly, this lower reliability  
97 did not show any systematic relation to the feedback modulation of firing rates (regression  
98 slope of  $-0.018 \pm 0.19$ , estimated slope  $\pm 2 \times$  the estimated standard error, LMM, **Fig. 1j**).  
99 Taken together, these results indicate that CT feedback can modulate responses of dLGN  
100 neurons to naturalistic movie clips. The modulations are consistent with a net depolarizing  
101 effect, which supports higher firing rates and more linear, tonic firing mode, at the expense  
102 of sparseness and trial-to-trial reliability.

### 103 *V1 suppression decreases dLGN responses to naturalistic movies by reducing response gain*

104 To better understand the effects of V1 suppression on dLGN firing rate, we next asked  
105 whether the observed reduction in responsiveness could be explained by a divisive and/or  
106 subtractive mechanism (**Fig. 2**). Using repeated random sub-sampling cross-validation, we  
107 fit a simple threshold linear model (**Fig. 2a, inset**) to timepoint-by-timepoint responses in

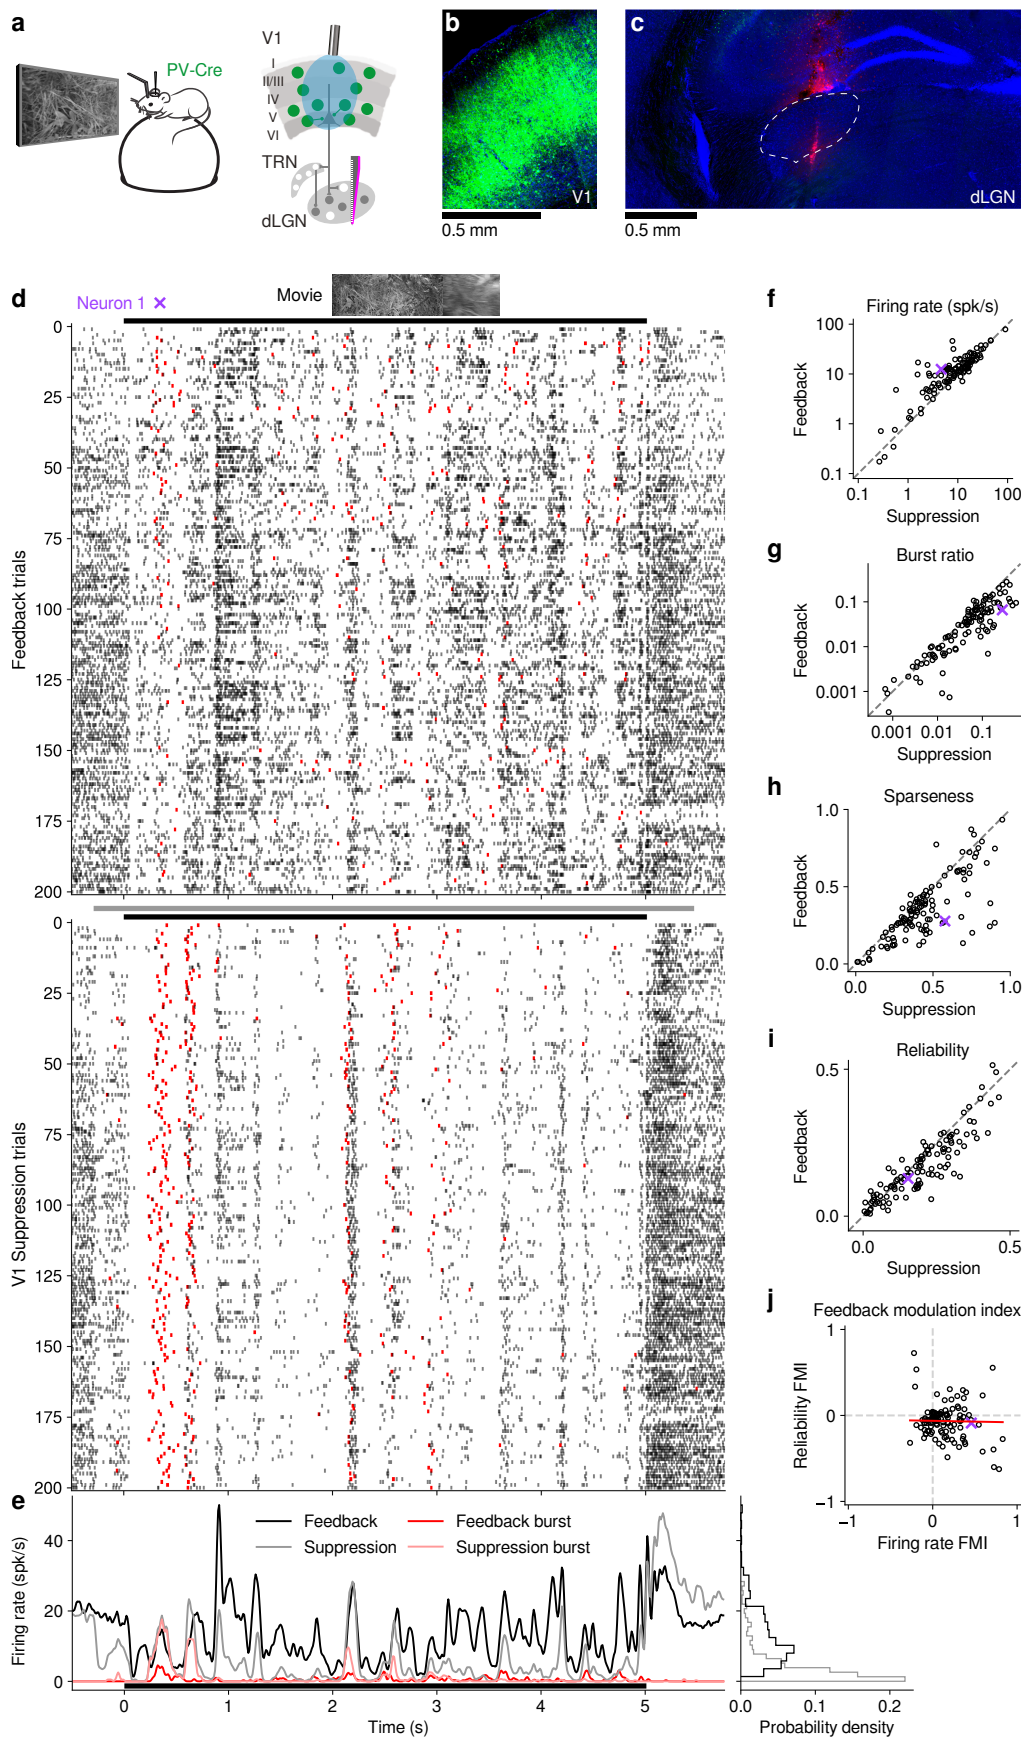



**Figure 1 (Previous page)** CT feedback modulates dLGN responses to wide-field naturalistic movie clips. **(a)** *Left*: Schematic of experimental setup. Head-fixed mice were placed on a floating Styrofoam ball and visual stimuli were presented on a screen located  $\sim 25$  cm away from the animal. *Right*: ChR2 was conditionally expressed in PV+ inhibitory interneurons (*green*) in all layers of V1 using a viral approach. Extracellular silicon electrode recordings were performed in dLGN with and without optogenetic suppression of V1. **(b)** Coronal section close to the V1 injection site for an example PV-Cre mouse (blue: DAPI; green: eYFP; Bregma:  $-3.4$  mm). **(c)** Coronal section at the dLGN (white outline) recording site, same animal as in (b). For post-mortem confirmation of the electrode position, the back of the probe was stained with DiI (*magenta*) for one of the recording sessions (blue: DAPI; Bregma:  $-1.82$  mm). **(d)** Raster plots of an example neuron for 200 presentations of a 5 s naturalistic movie clip, with CT feedback intact (control condition, *top*) and during V1 suppression (*bottom*). *Red*: burst spikes; *black bar*: movie clip presentation; *gray bar*: V1 suppression. **(e)** *Left*: PSTHs for both the feedback (*black*) and V1 suppression (*gray*) conditions. Superimposed are PSTHs of burst spikes only, separately for feedback (*red*) and suppression (*pale red*) conditions. *Right*: Corresponding instantaneous firing rate distributions. **(f-i)** Comparison of feedback vs. suppression conditions for mean firing rate (f), burst spike ratio (g), temporal sparseness (h), and response reliability (i), all calculated for the duration of the movie clip. For sample sizes, see [Table 1](#). *Purple*: example neuron. Sparseness captures the activity fraction of a neuron, re-scaled between 0 and 1 [54]. Response reliability is defined as the mean Pearson correlation of all single trial PSTH pairs [55]. **(j)** Relation between CT feedback modulation of firing rate and reliability. Feedback effects were quantified with a feedback modulation index (FMI), where  $FMI = (\text{feedback} - \text{suppressed}) / (\text{feedback} + \text{suppressed})$ . See also [Fig. S2](#).

108 suppression vs. feedback conditions, and extracted the slope and threshold of the fit for  
109 each subsample ([Fig. 2b,d](#)). In the two example neurons shown in [Fig. 2a-d](#), the fitted  
110 slope was significantly smaller than 1 (neuron 2: median slope of 0.66, 95%-CI: 0.63–0.69,  
111 [Fig. 2b](#); neuron 1: median slope of 0.37, 95%-CI: 0.32–0.41, [Fig. 2d](#)), while the threshold  
112 ( $x$ -intercept) was either small or not significantly different from 0 (neuron 2: median of 1.58,  
113 95%-CI: 0.39–2.91; neuron 1: median of  $-0.14$ , 95%-CI:  $-1.49$ – $0.89$ ). We obtained similar  
114 results for the population of recorded neurons, where V1 suppression decreased the neurons’  
115 responses to naturalistic movie clips via a substantial change in gain (slope of  $0.76 \pm 0.1$ ;  
116 LMM) without a significant shift in baseline (threshold of  $0.013 \pm 1.3$ ; LMM; [Fig. 2e](#)). This  
117 demonstrates that V1 suppression influences responses in dLGN to naturalistic movie clips  
118 predominantly via a divisive mechanism.

119 We noticed that the threshold linear model could predict the effects of V1 suppression  
120 better for some neurons than for others. We therefore explored whether poor fits of the  
121 model might be related to our finding that V1 suppression can trigger non-linear, burst-  
122 mode firing. For instance, the threshold-linear model accurately captured the responses of  
123 example neuron 2 (median  $R^2 = 0.90$ , cross-validated; [Fig. 2a,b](#)), which exhibited little  
124 bursting during V1 suppression (burst ratio: 0.007). Neuron 1, in contrast, had a higher  
125 burst ratio during suppression (0.28) and the prediction (*blue*) sometimes overestimated or  
126 underestimated peaks in the actual response (*gray*), such that the percentage of explained  
127 variability was rather low (median  $R^2 = 0.29$ , cross-validated, [Fig. 2c,d](#)).

128 Indeed, across the population of recorded cells, the model goodness of fit (median  $R^2$ ,  
129 cross-validated) during V1 suppression was inversely related to the burst ratio (slope of  
130  $-1.4 \pm 0.5$ ; LMM; [Fig. 2f](#)), consistent with the notion that the highly non-linear, all-  
131 or-none-like burst mode firing [56] cannot be captured by the threshold-linear model. To  
132 further investigate the impact of bursting on response transformations by CT feedback, we re-  
133 computed the PSTHs for each neuron during V1 suppression after removing all burst spikes.

134 Removal of burst spikes allowed our model to capture the effects of V1 suppression even  
135 better (all spikes: mean  $R^2 = 0.60$ ; non-burst spikes: mean  $R^2 = 0.63$ ; LMM:  $F_{1,150.49} =$   
136  $7.6$ ,  $p = 0.0066$ ; **Fig. 2g**). At the same time, removing burst spikes did not change our  
137 conclusion that the effect of CT feedback on movie responses was predominantly divisive  
138 (slope:  $0.75 \pm 0.09$ ; threshold:  $0.22 \pm 1.33$ ; LMM; **Fig. 2h**). Indeed, firing mode (all spikes  
139 vs. non-burst spikes) had no effect on either slope (LMM:  $F_{1,153.7} = 0.57$ ,  $p = 0.45$ ) or  
140 threshold estimates (LMM:  $F_{1,150.64} = 0.21$ ,  $p = 0.65$ ) of the simple linear model.

#### 141 *CT feedback modulates dLGN responses evoked by drifting gratings*

142 Previous studies have investigated the effects of CT feedback using artificial stimuli,  
143 such as gratings and bars [25, 34, 41, 44]. To relate our findings to these studies, and  
144 to investigate the role of stimulus type, we next examined the effects of V1 suppression  
145 during the presentation of drifting gratings (**Fig. 3**). To approximate the visual stimulus  
146 configuration used for naturalistic movie clips, we presented full-field gratings drifting in one  
147 of 12 different orientations, and selected a pseudo-random subset of trials for V1 suppression.  
148 As expected, we found that responses of single dLGN neurons in the control condition with  
149 CT feedback intact could be modulated at the temporal frequency (TF, 4 cyc/s) of the  
150 drifting grating (**Fig. 3a<sub>1</sub>, b<sub>1</sub>**). Similar to previous studies in mouse dLGN [57–59], we also  
151 encountered some dLGN neurons with tuning for grating orientation or direction (**Fig. 3a<sub>2</sub>,**  
152 **b<sub>2</sub>**).

153 Remarkably, V1 suppression had mixed effects on dLGN responses to drifting gratings.  
154 Example neuron 1, for instance, had lower firing rates with CT feedback intact, both in the  
155 orientation tuning (**Fig. 3a<sub>2</sub>**) and the cycle-averaged response to the preferred orientation  
156 (**Fig. 3a<sub>3</sub>**). In addition, with CT feedback intact, there were markedly fewer burst spikes.  
157 In contrast, example neuron 3 responded more strongly with CT feedback intact (**Fig. 3b<sub>2</sub>,**  
158 **b<sub>3</sub>**). Such diverse effects of CT feedback were representative of the recorded population  
159 (**Fig. 3c**): V1 suppression during grating presentation reduced responses for some neurons,  
160 but increased responses for others, such that the average firing rates were almost identi-  
161 cal (feedback: 14.3 spikes/s, suppression: 14.8 spikes/s) and statistically indistinguishable  
162 (LMM:  $F_{1,67.8} = 0.17$ ,  $p = 0.68$ ). In contrast to these diverse effects on firing rate, but similar  
163 to our findings for naturalistic movie clips, intact CT feedback was consistently associated  
164 with less bursting (burst ratios of 0.036 vs. 0.17; LMM:  $F_{1,73.43} = 42.5$ ,  $p = 7.7 \times 10^{-9}$ ;  
165 **Fig. 3d**).

166 Beyond studying overall changes in responsiveness and firing mode, we next asked how  
167 CT feedback affected the orientation selectivity of dLGN neurons. We computed orientation  
168 tuning curves separately for feedback and suppression conditions. For neuron 1, intact CT  
169 feedback was associated not only with lower average firing rates, but also poorer selectivity  
170 (OSIs of 0.14 vs. 0.25; **Fig. 3a<sub>2</sub>**). In contrast, for neuron 3, orientation selectivity was similar  
171 during feedback and suppression conditions (OSIs of 0.1 vs. 0.09; **Fig. 3b<sub>2</sub>**). These results  
172 were representative of the population, where CT feedback affected orientation selectivity in  
173 diverse ways, with virtually no difference in population means (feedback OSI: 0.14; suppres-  
174 sion: 0.13; LMM:  $F_{1,67} = 0.51$ ,  $p = 0.48$ ; **Fig. 3e**; see also [25, 46, 47, 60]). For neurons  
175 with OSI > 0.02 and well-fit orientation tuning curves ( $R^2 > 0.5$ ), preferred orientation  
176 during feedback and suppression conditions was largely similar, except for some cases where  
177 it shifted (**Fig. 3f**).

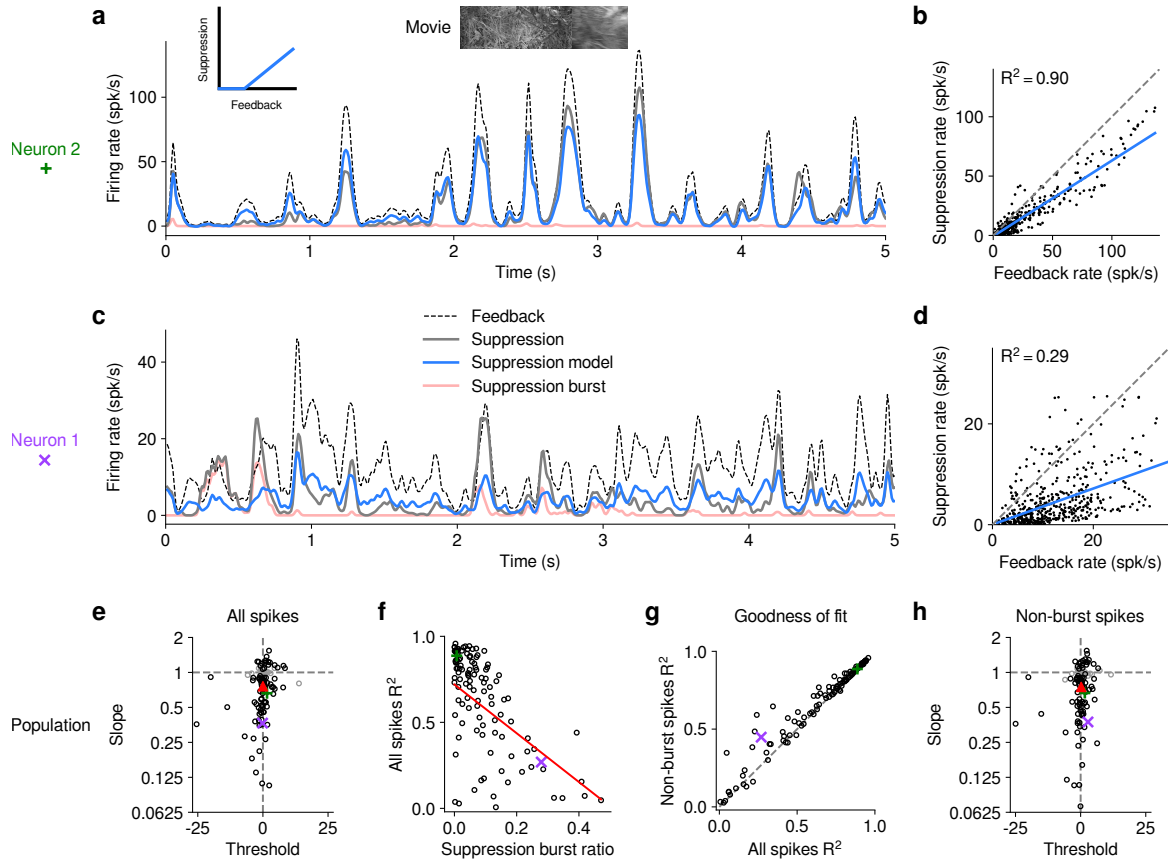

**Figure 2** The effect of V1 suppression on dLGN responses to naturalistic movie clips is predominantly divisive.

(a) PSTHs of an example neuron during CT feedback (*black, dotted*) and V1 suppression (*gray*) conditions, for a random subset of 50% of trials per condition not used for model fitting. Responses during the suppression condition are approximated by the threshold linear model (*blue*) based on responses during the feedback condition. *Pale red*: PSTH during V1 suppression consisting only of burst spikes. *Inset*: cartoon of threshold linear model. (b) Timepoint-by-timepoint comparison of instantaneous firing rates of the PSTHs (derived from the 50% of trials not used for fitting) during the suppression vs. feedback conditions. PSTH data points are plotted at 0.01 ms resolution. *Blue line*: threshold linear model fit. (c,d) Same as (a,b) for a second example neuron (same as in Fig. 1d,e). (e) Slope and threshold parameters for all neurons. Each point represents the median for each neuron across 1000 random subsamples of trials. Black points indicate neurons with slopes significantly different from 1 (95%-CI). (f) Cross-validated model prediction quality (median  $R^2$ ) vs. burst ratio during V1 suppression. *Red line*: LMM fit. (g) Model prediction quality with and without removal of burst spikes. (h) Same as (e) but with burst spikes removed. (e-h) *Purple, green*: example neurons; *red triangle*: LMM estimate of the mean.

178 Inspecting the spike rasters at different orientations, we realized that responses of geniculate neurons appeared to be more strongly modulated at the grating TF during V1 suppression than when feedback was intact (**Fig. 3a<sub>1</sub>**). To test whether V1 suppression affected the ability of dLGN neurons to follow the gratings' temporal modulation, for each neuron we computed the amplitude of the response at the stimulus frequency ( $F_1$  component) relative to the mean response ( $F_0$  component) [61, 62] and found that  $F_1/F_0$  ratios were indeed lower when feedback was intact (1.1 vs. 1.3; LMM:  $F_{1,69} = 20.01$ ,  $p = 3 \times 10^{-5}$ ; **Fig. 3g**). To explore the impact of CT feedback on the first harmonic response in more detail, we examined the cycle average responses to the preferred orientation, and asked how CT feedback affected response phase. Similar to the results obtained for the example neurons (**Fig. 3a<sub>3</sub>**, **Fig. 3b<sub>3</sub>**), we found that V1 suppression could advance response phase (**Fig. 3h**). This phase advance occurred more often for neurons whose responses during V1 suppression included a substantial proportion of burst spikes (**Fig. 3i**, *red*; 23 of 26 observations advanced,  $p = 8.8 \times 10^{-5}$ , binomial test) than for neurons whose V1 suppression responses had little or no bursting (**Fig. 3i**, *black*; 8 of 14 observations advanced,  $p = 0.79$ , binomial test), suggesting that the phase advance might be driven by the dynamics of burst spiking. In summary, these findings demonstrate that CT feedback can affect response phase, likely via its control of firing mode.

#### 196 *Effects of CT feedback on dLGN firing rates are more consistent for movies than gratings*

197 Our analyses suggest that the impact of CT feedback on firing rates might be more consistent for naturalistic movie stimuli than for gratings. To test this hypothesis, we focused on the subset of neurons recorded with both types of stimuli. Indeed, when we compared feedback modulation indices (FMI) of firing rates, we found that for movies the overall FMI distribution was shifted towards more positive values (0.15 vs. 0.0046; LMM:  $F_{1,35} = 13.66$ ,  $p = 0.00075$ ; (**Fig. 4a**). This difference in FMI was not a consequence of the longer duration of V1 suppression during movie clips (**Fig. S3**). Remarkably, in 12/36 neurons (**Fig. 4a**, filled arrowheads) V1 suppression increased firing rates for gratings (negative grating FMI) [41] and decreased firing rates for movies (positive movie FMI), while the opposite effect only occurred in 1/36 neurons (open arrowhead). This sign change might be related to stimulus-dependent, feedback-mediated changes in bursting, which can drive high frequency firing. To test this hypothesis we compared CT feedback modulation of burst ratio for gratings vs. movie clips, and found that V1 suppression indeed induced stronger bursting for gratings than for movies (mean FMIs:  $-0.43$  vs.  $-0.28$ ; LMM:  $F_{1,33} = 41.9$ ,  $p = 2.4 \times 10^{-7}$ ; **Fig. 4b**). Thus, the stronger engagement of burst spiking for gratings might antagonize and overcome the reduction of firing rates that would otherwise occur during V1 suppression.

#### 213 *Effects of locomotion on dLGN responses resemble effects of CT feedback, but are independent*

214 Previous studies have reported that responses of mouse dLGN neurons to grating stimuli are modulated by locomotion [63–65]. To assess how these findings extend to more complex stimuli, we separated the trials with CT feedback intact according to the animals' locomotion behavior. When we examined the spike rasters and PSTHs of example neuron 1 (**Fig. 5a,b**), we found that, despite preserved temporal features of the responses (Pearson correlation  $r = 0.72$  between run and sit PSTHs,  $p < 10^{-6}$ ), firing rates were higher overall during locomotion than stationary periods. Additionally, during locomotion, the distribution of firing rates was



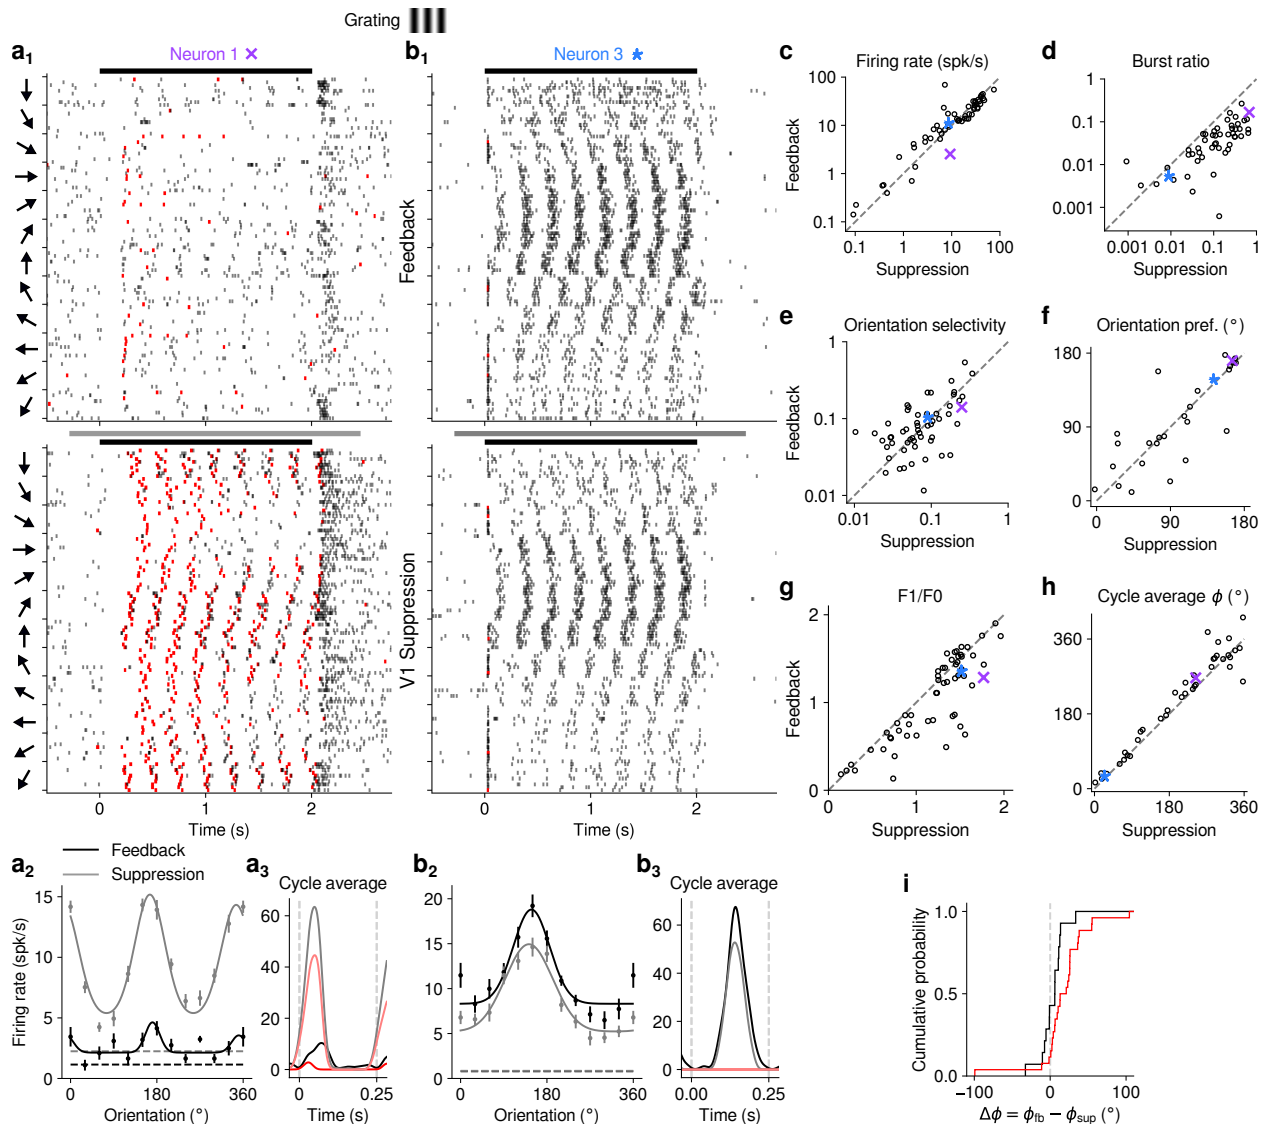

**Figure 3** CT feedback modulates dLGN responses to drifting gratings.

(a) Responses of example neuron 1 (same as in Fig. 1d,e and Fig. 2c,d) to full-field, drifting gratings. (a<sub>1</sub>) Raster plot in response to drifting gratings, with trials sorted by grating orientation (10 trials per orientation, 30° steps). Red: burst spikes. (a<sub>2</sub>) Corresponding orientation tuning curve. Dashed lines represent spontaneous firing rates in response to medium gray screen. Error bars: standard error of the mean. (a<sub>3</sub>) Cycle average response to preferred orientation. Black, gray: cycle average constructed from all spikes. Red, pale red: cycle average constructed from burst spikes only. Black, red: CT feedback intact; gray, pale red: V1 suppression. (b) Same as (a), for example neuron 3. (c–h) Comparison of conditions with CT feedback intact vs. V1 suppression, for mean firing rate (c), burst ratio (d), orientation selectivity index (OSI) (e), preferred orientation  $\theta$  (f), F<sub>1</sub>/F<sub>0</sub> (g), and cycle average phase  $\phi$  (h). Purple, blue: example neurons. (i) Cumulative distribution of cycle average phase differences between feedback and suppression conditions. Black: neurons with little burst spiking (ratio of cycle average peak for burst spikes to cycle average peak for all spikes < 0.1); red: neurons with substantial burst spiking (ratio of cycle average peak for burst spikes to cycle average peak for all spikes  $\geq$  0.1).

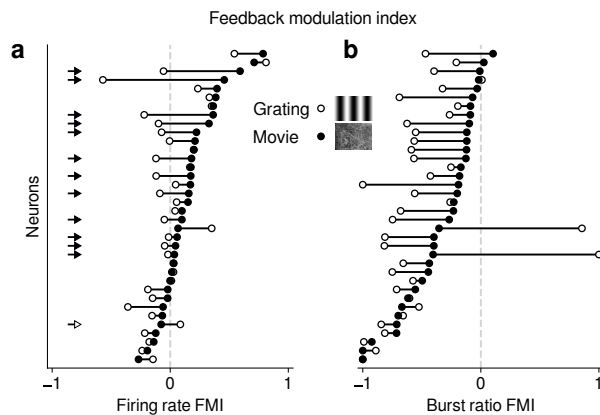

**Figure 4** Effects of V1 suppression depend on stimulus type.

(a,b) Comparison of the strength of CT feedback effects (feedback modulation index, FMI), during processing of gratings and movie clips on (a) firing rates, and (b) burst ratio. Neurons are sorted along the ordinate according to their FMI in response to movies. *Black*: movie FMI; *white*: grating FMI. Arrows in (a) highlight neurons for which feedback modulation switches sign depending on stimulus type. For the statistical analysis in (b), we excluded the two outliers with highly positive FMIs for gratings, which showed no bursts or only one burst during V1 suppression. See also [Fig. S3](#).

221 less skewed ( $\gamma = 1.15$  vs.  $1.45$  during stationary trials), with a decrease in low and an increase  
 222 in medium firing rates (KS test,  $p < 10^{-6}$ ). A similar pattern was observed in the population  
 223 of dLGN neurons, where firing rates were consistently higher for trials with locomotion  
 224 compared to trials when the animal was stationary ( $13.31$  vs.  $10.27$  spikes/s; LMM:  $F_{1,193.2} =$   
 225  $15.5$ ,  $p = 0.00012$ ; [Fig. 5c](#)). Similar to previous reports using gratings [63, 66], we found  
 226 that bursting was lower during locomotion than stationary periods ( $0.046$  vs.  $0.071$ ; LMM:  
 227  $F_{1,186.7} = 28.9$ ,  $p = 2.3 \times 10^{-7}$ ; [Fig. 5d](#)). Beyond these established measures, using movie  
 228 clips allowed us to test the effects of locomotion on additional response properties: trials  
 229 with locomotion were associated with lower sparseness ( $0.40$  vs.  $0.47$ ; LMM:  $F_{1,190.5} = 20.3$ ,  
 230  $p = 1.2 \times 10^{-5}$ ; [Fig. 5e](#)) and lower response reliability ( $0.14$  vs.  $0.17$ ; LMM:  $F_{1,174.9} = 11.8$ ;  
 231  $p = 0.00072$ ; [Fig. 5f](#)). This locomotion-related decrease of response reliability could be  
 232 related to, but is likely not fully explained by, the increase in eye movements typically  
 233 associated with running ([Fig. S4f,g](#)) [63, 67]. These analyses demonstrate that in dLGN,  
 234 processing of naturalistic movie clips is robustly modulated by locomotion. Curiously, in all  
 235 aspects tested, these modulations by locomotion had the same signatures as those of CT  
 236 feedback: increased firing rates, reduced bursting, and decreased sparseness and reliability.

237 Since the effects of CT feedback and locomotion closely resembled each other, are the  
 238 effects of locomotion on dLGN responses inherited via feedback from cortex? If so, neurons  
 239 experiencing strong modulation by V1 suppression should also be strongly affected by loco-  
 240 motion ([Fig. 6a<sub>0</sub>](#)). Contrary to this prediction, we found that effects of CT feedback (FMI)  
 241 and behavioral state (run modulation index, RMI) were uncorrelated (firing rate: slope of  
 242  $0.057 \pm 0.13$ ; burst ratio: slope of  $-0.11 \pm 0.13$ ; sparseness: slope of  $-0.061 \pm 0.20$ ; reliability:  
 243 slope of  $-0.094 \pm 0.12$ ; [Fig. 6a<sub>1-4</sub>](#)).

244 Moreover, if effects of locomotion on dLGN responses were inherited from primary visual  
 245 cortex, such effects should vanish during V1 suppression ([Fig. 6b<sub>0</sub>](#)). However, even during  
 246 V1 suppression, RMIs were significantly different from 0 (firing rate:  $0.17 \pm 0.08$ ; burst ratio:

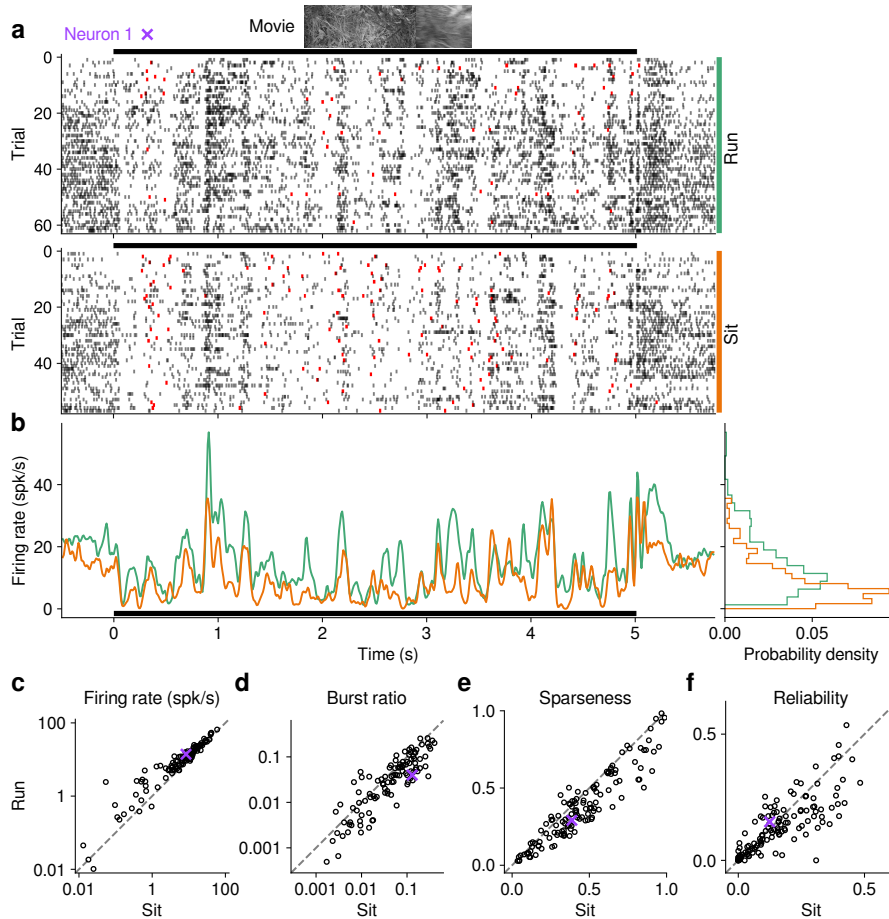

**Figure 5** Effect of locomotion on dLGN responses are robust and resemble those of CT feedback.

(a) Spike raster of example neuron 1 (same as Fig. 1d) in response to a naturalistic movie clip during locomotion and stationary periods. *Top*: trials with run speed > 1 cm/s; *bottom*: trials with run speed < 0.25 cm/s, both for at least > 50% of each trial. *Red*: burst spikes. (b) Corresponding PSTHs. *Green*: locomotion, *orange*: stationary; *black bar*: duration of movie clip. *Right*: Distribution of firing rates for run vs. sit trials. (c–f) Comparison of firing rates (c), burst ratio (d), sparseness (e), and reliability (f) during locomotion and stationary trials. See also Fig. S4.

247  $-0.16 \pm 0.14$ ; sparseness:  $-0.12 \pm 0.02$ ; reliability:  $-0.11 \pm 0.08$ ; **Fig. 6b<sub>1-4</sub>**). In fact, the  
248 degree of running modulation was correlated between feedback and suppression conditions  
249 (firing rate: slope of  $0.48 \pm 0.13$ ; burst ratio: slope of  $0.37 \pm 0.21$ ; sparseness: slope of  
250  $0.44 \pm 0.14$ ; reliability: slope of  $0.50 \pm 0.15$ ; **Fig. 6b<sub>1-4</sub>**). Interestingly, for firing rates and  
251 burst ratios, locomotion effects were slightly stronger, on average, with CT feedback intact  
252 compared to V1 suppression (RMI firing rate: 0.20 vs. 0.17; LMM:  $F_{1,189.7} = 3.7$ ,  $p = 0.055$ ,  
253 **Fig. 6b<sub>1</sub>**; RMI burst ratio:  $-0.25$  vs.  $-0.17$ ; LMM:  $F_{1,154.7} = 6.3$ ,  $p = 0.013$ , **Fig. 6b<sub>2</sub>**),  
254 indicating that these two modulatory influences likely interact.

255 Lastly, we also tested the hypothesis that CT feedback might have a stronger impact  
256 during active behavioral states than during quiescence. If during quiescence feedback circuits  
257 were already completely disengaged, we should not have been able to observe further effects  
258 of V1 suppression (**Fig. 6c<sub>0</sub>**). This was clearly not the case, because CT feedback effects  
259 were correlated across behavioral states (firing rate: slope of  $0.72 \pm 0.10$ ; burst ratio: slope  
260 of  $0.34 \pm 0.15$ ; sparseness: slope of  $0.78 \pm 0.12$ ; reliability: slope of  $0.43 \pm 0.14$ ; **Fig. 6c<sub>1-4</sub>**).  
261 In addition, and similar to the slightly stronger RMIs during feedback, we discovered a  
262 locomotion-dependent feedback effect for firing rates and burst ratios. Feedback effects were  
263 slightly stronger, on average, during locomotion than during quiescence (FMI firing rate:  
264 0.17 vs. 0.14; LMM:  $F_{1,183.8} = 3.4$ ,  $p = 0.067$ ; **Fig. 6c<sub>1</sub>**; FMI burst ratio:  $-0.28$  vs.  $-0.20$ ;  
265 LMM:  $F_{1,164.2} = 6.8$ ,  $p = 0.010$ ; **Fig. 6c<sub>2</sub>**). Our ability to observe effects of V1 suppression  
266 in dLGN while the animal was stationary suggests that CT feedback circuits are engaged  
267 even under conditions of behavioral quiescence and underscores that effects of CT feedback  
268 and behavioral state are largely independent. The more subtle interactions we observed  
269 between the two modulatory systems point towards a final common cellular or network  
270 effect, potentially related to depolarization levels of dLGN neurons.

## 271 Discussion

272 In this study we used naturalistic movies to reveal that corticothalamic feedback can  
273 have substantial and consistent effects on dLGN responses. First, we show that V1 suppres-  
274 sion reduces time-varying dLGN firing rates, and leads to increases in bursting, sparseness  
275 and trial-to-trial reliability. While changes to time-varying firing rates were generally well  
276 predicted via a divisive reduction in response gain, a simple threshold-linear model could  
277 not capture the full spectrum of CT feedback effects, which include nonlinearities arising  
278 from burst spiking. Second, we demonstrate that behavioral state changes from locomotion  
279 to quiescence affect dLGN responses in a manner that closely resembles V1 suppression. We  
280 show, however, that the effects of V1 suppression on firing rate, bursting, sparseness and  
281 reliability are largely independent of modulations by behavioral state, and importantly, that  
282 effects of locomotion persist even when V1 activity is suppressed. Together, these findings  
283 demonstrate that behavioral modulations of dLGN activity are not simply inherited from  
284 cortex. Overall, our findings highlight the fact that dLGN activity can be reliably modu-  
285 lated by extra-retinal influences such as cortical feedback and locomotion, which exert their  
286 influences via largely separate routes.

287 To manipulate CT feedback, we chose a global V1 suppression approach based on opto-  
288 genetic activation of ChR2 expressed in local PV+ inhibitory interneurons [41, 46–48, 68].  
289 ChR2-based activation of local PV+ inhibitory interneurons is likely to result in reliable,

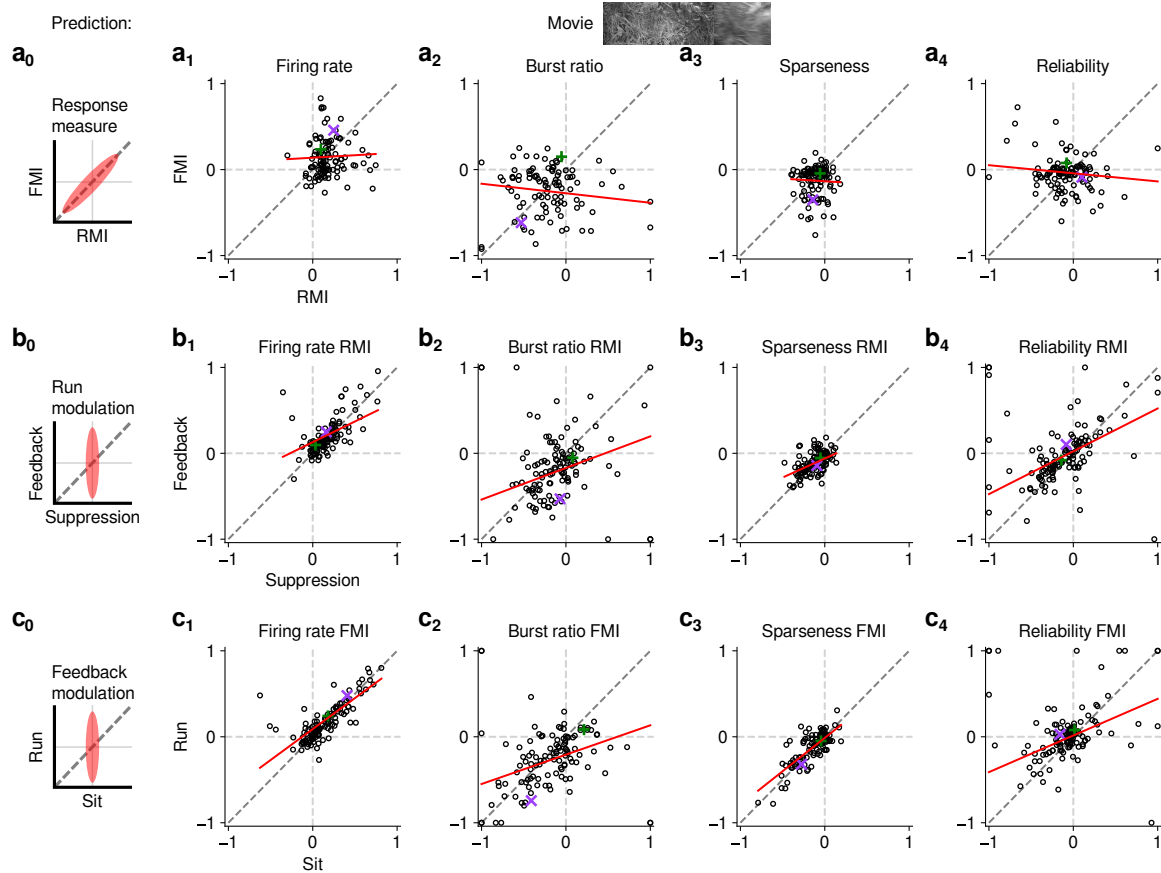

**Figure 6** The effects of CT feedback and locomotion on movie responses were largely independent and similar in size.

(a<sub>0</sub>-c<sub>0</sub>) Predicted relationships between modulation indices and response measures in different conditions, assuming dependence in the effects of CT feedback and locomotion. (a) Comparison of modulation by feedback (FMI) and modulation by running (RMI) for firing rates (a<sub>1</sub>), burst ratio (a<sub>2</sub>), sparseness (a<sub>3</sub>), and reliability (a<sub>4</sub>). Running effects were quantified with a run modulation index (RMI), where  $RMI = (\text{running} - \text{sitting}) / (\text{running} + \text{sitting})$ . (b) Comparison of modulation by running (RMI) during V1 suppression and CT feedback intact for firing rates (b<sub>1</sub>), burst ratio (b<sub>2</sub>), sparseness (b<sub>3</sub>), and reliability (b<sub>4</sub>). (c) Comparison of modulation by CT feedback (FMI) during locomotion and stationary periods for firing rates (c<sub>1</sub>), burst ratio (c<sub>2</sub>), sparseness (c<sub>3</sub>), and reliability (c<sub>4</sub>). Red: LMM fit. Green, purple: example neurons from Fig. 2a,b.



290 continuous, and strong suppression of V1 L6 CT neurons, compared to alternative optoge-  
291 netic approaches involving direct photosuppression of L6 CT neurons. The latter approach  
292 involves the light-driven pumps archaerhodopsin and halorhodopsin [25, 41], and is chal-  
293 lenging in terms of light power requirements, temporal decay of sensitivity, and effects on  
294 intracellular ion homeostasis [68, 69]. While silencing by excitation of inhibitory interneu-  
295 rons can exploit the robust effects of GABA-mediated inhibition in cortical circuits, it comes  
296 with a limitation in specificity. In addition to the direct L6  $\rightarrow$  thalamus circuit, indirect,  
297 polysynaptic effects might be exerted via alternative routes. One example is L5 corticofugal  
298 pyramidal cells projecting to the superior colliculus (SC), where tectogeniculate neurons in  
299 the superficial layers provide retinotopically organized, driving inputs to the dorsolateral  
300 shell region of the dLGN [70]. While global V1 suppression can indeed modulate the gain  
301 of SC responses [71, 72], direct optogenetic suppression of mouse SC evokes gain changes  
302 restricted to the most dorsal 150  $\mu\text{m}$  of the dLGN [73]. The spatial spread of modulations we  
303 observed during V1 suppression clearly extended below the most dorsal electrode contacts,  
304 which is inconsistent with a major role of indirect SC contributions. To unequivocally rule  
305 out alternative routes, future studies are required that selectively suppress activity in V1 L6  
306 CT neurons.

307 So far, studies using naturalistic stimuli to probe dLGN responses have been mostly  
308 performed in anesthetized animals and have not considered CT feedback [74–78]. Con-  
309 versely, most studies investigating the impact of CT feedback have used artificial stimuli  
310 [25, 34, 41, 44]. Early experimental evidence already suggested that more complex visual  
311 patterns, and in particular moving stimuli, might better engage CT feedback circuits [17, 49].  
312 From a conceptual perspective, if the role of feedback was to provide context based on an in-  
313 ternal model built from the statistics of the world [79–82], natural stimuli would be expected  
314 to best comply with this model, and hence better drive these feedback mechanisms. Consis-  
315 tent with these ideas, we found that CT feedback-mediated modulations of firing rate were  
316 more consistent and therefore overall stronger for naturalistic movie clips than for gratings.  
317 A simple biophysical mechanism, however, might be sufficient to explain the differences of  
318 CT feedback effects for stimulus types: effects of V1 suppression on firing rate might have  
319 been masked for gratings, because their regular transitions from non-preferred to preferred  
320 phases strongly recruited high-frequency burst spiking. While movies have been little used  
321 in experimental studies of CT feedback, naturalistic input has recently been explored with a  
322 firing-rate based network model of the thalamo-cortico-thalamic circuit [83], which predicts  
323 that CT feedback during movie stimulation changes the autocorrelation of dLGN responses.  
324 Our results of increased sparseness during V1 suppression are grossly compatible with one  
325 model circuit architecture, which includes both short-delay inhibitory and long-delay exci-  
326 tatory feedback. Further analyses and an adaption of the model to properties of the mouse  
327 visual system would be required to draw firm conclusions.

328 In line with previous studies in non-human primates and cats [42–45], suppression of  
329 V1 activity revealed not only effects consistent with a robust role of CT feedback in en-  
330 hancing the gain of geniculate responses, but also identified functional interactions with the  
331 neural mechanisms governing thalamic firing mode. Decreased responsiveness and a higher  
332 burst spike ratio during V1 suppression are consistent with a net hyperpolarization of dLGN  
333 neurons [56], which allows for the transient low-threshold calcium current ( $I_T$ ) underlying  
334 thalamic bursting [84]. Indeed, intracellular recordings in cat dLGN revealed that cortical

335 ablation hyperpolarized the resting membrane potential by  $\sim 9$  mV, enough to push dLGN  
336 neurons into burst-firing mode [85]. Conversely, direct optogenetic activation of L6 CT neu-  
337 rons in primary somatosensory cortex has been shown to decrease burst mode firing [86].  
338 Since firing rates are high during hyperpolarization-induced geniculate bursts [56], general  
339 decreases in response gain during V1 suppression could well be offset by burst firing. Indeed,  
340 during naturalistic movie stimulation, the threshold linear model systematically underes-  
341 timated firing rates during bursting (**Fig. 2c,f-h**). Similarly, during grating stimulation,  
342 for which V1 suppression recruits burst firing more than for naturalistic movie stimulation  
343 (**Fig. 4b**), CT feedback did not have consistent effects on firing rate (**Fig. 3c**). Hyperpolar-  
344 ization of dLGN neurons and the resultant high frequency burst spiking, can, in principle, be  
345 achieved not only by a reduction of the direct excitatory influence of CT feedback, but also  
346 by an enhancement of its indirect, inhibitory impact [29]. Hence, diverse effects of CT feed-  
347 back manipulation on firing rate are not surprising, in particular if firing mode is not taken  
348 into account. In the future, it will be important to characterize in detail the dependence of  
349 CT feedback effects on strength of suppression to get insights into the range of effects that  
350 CT feedback can exert.

351 Can the influence of feedback on dLGN firing mode allow us to assign a clear function to  
352 CT feedback? In burst firing mode, spontaneous activity is low, strongly rectified responses  
353 result in high signal-to-noise ratio [56], stimulus-evoked responses show phase-advance, and  
354 retinogeniculate [87] and cortical action potentials [88] are elicited with high efficiency. Dur-  
355 ing processing of naturalistic stimuli, bursting can be triggered upon transition from non-  
356 preferred to preferred receptive field contents [75-77]. Such a response regime would be well  
357 suited for stimulus detection [56, 76, 89]. If stimulus detection were to then activate the CT  
358 feedback system, potentially in a spatially specific way, this could shift dLGN to tonic mode  
359 better suited for more linear, detailed image representation [56] (but see [90] for evidence  
360 from the somatosensory system that thalamic bursts might also carry information about  
361 stimulus detail). To understand if CT feedback is indeed recruited for detailed perceptual  
362 analyses, an essential next step would be to measure the activity of L6 CT neurons under  
363 behaviorally relevant conditions. Interestingly, in the auditory system, activation of L6 CT  
364 feedback has been shown to influence sound perception, with enhancements of sound detec-  
365 tion or discrimination behavior, depending on the relative timing between CT spiking and  
366 stimulus onset [91].

367 By measuring the effects of V1 suppression during different behavioral states, we found  
368 that locomotion and CT feedback had similar effects on dLGN responses, but likely oper-  
369 ated via separate circuits. The relationship between feedback and brain state has previously  
370 been investigated in the context of anesthesia, which can reduce the responsiveness of L6  
371 CT neurons [31], and abolish activity in feedback projections from retrosplenial cortex to V1  
372 [51]. One might therefore predict that CT feedback circuits might not be engaged during  
373 stationary periods compared to locomotion. In contrast to this prediction, we demonstrate  
374 here that cortical feedback modulated thalamic responses even during quiescence. While we  
375 found that V1 suppression lead to clear effects during stationary periods, we also revealed  
376 that CT feedback effects during locomotion were slightly stronger. This subtle interaction  
377 between brain state and feedback effects might relate to a previous finding, where careful  
378 dissection of brain states by depth of anesthesia had already suggested that the effects of  
379 transient cortical inactivation on dLGN responses were more evident during lighter anes-

380 thesia, i.e., during desynchronized cortical activity [43]. Thus, locomotion, light anesthesia  
381 and desynchronized brain states in general might leave more room for CT feedback to reg-  
382 ulate membrane potential levels in dLGN, which in turn affects firing rates and bursting.  
383 Likewise, we found that effects of locomotion on dLGN responses [63–65] were clearly not  
384 inherited from cortex (see also [92]), but tended to be stronger when CT feedback was intact.  
385 Taken together, despite arising from independent sources, modulations by CT feedback and  
386 behavioral state had a similar phenotype and could interact in their modulation of dLGN  
387 activity. We speculate that this similarity points towards final shared cellular or network  
388 mechanisms, likely related to changes in the depolarization level of dLGN neurons.

## 389 Acknowledgments

390 This research was supported by DFG SFB870 TP19 (LB), DFG BU 1808/5-1 (LB),  
391 and by an add-on fellowship of the Joachim Herz Stiftung (GB). We thank D. Metzler for  
392 discussions regarding the multi-level modeling, M. Sotgia for lab management and support  
393 with animal handling and histology, S. Schörnich for IT support, and B. Grothe for providing  
394 excellent research infrastructure.

## 395 Author contributions

396 Conceptualization, L.B. and M.A.S.; Methodology, M.A.S., D.C.; Software, M.A.S., S.K.,  
397 G.B., D.C., L.B.; Formal Analysis, S.K.; Investigation, M.A.S.; Data Curation, M.A.S.,  
398 G.B., D.C., L.B.; Writing – Original Draft, L.B., G.B.; Writing – Review & Editing, L.B.,  
399 S.K., M.A.S., G.B., D.C.; Visualization, M.A.S., G.B., S.K.; Supervision, L.B.; Project  
400 Administration, L.B.; Funding Acquisition, L.B.

## 401 Declaration of Interests

402 The authors declare no competing interests.

## 403 Methods

404 All procedures complied with the European Communities Council Directive 2010/63/EC  
405 and the German Law for Protection of Animals, and were approved by local authorities,  
406 following appropriate ethics review.

### 407 *Surgical procedures*

408 Experiments were carried out in 6 adult PV-Cre mice (median age at first recording ses-  
409 sion: 24.71 weeks; B6;129P2-Pvalb<sup>tm1(cre)Arbr</sup>/J; Jackson Laboratory) of either sex. Thirty  
410 minutes prior to the surgical procedure, mice were injected with an analgesic (Metamizole,  
411 200 mg/kg, sc, MSD Animal Health, Brussels, Belgium). To induce anesthesia, animals  
412 were placed in an induction chamber and exposed to isoflurane (5% in oxygen, CP-Pharma,  
413 Burgdorf, Germany). After induction of anesthesia, mice were fixated in a stereotaxic frame  
414 (Drill & Microinjection Robot, Neurostar, Tuebingen, Germany) and the isoflurane level  
415 was lowered (0.5%–2% in oxygen), such that a stable level of anesthesia could be achieved

416 as judged by the absence of a pedal reflex. Throughout the procedure, the eyes were cov-  
417 ered with an eye ointment (Bepanthen, Bayer, Leverkusen, Germany) and a closed loop  
418 temperature control system (ATC 1000, WPI Germany, Berlin, Germany) ensured that  
419 the animal's body temperature was maintained at 37° C. At the beginning of the surgi-  
420 cal procedure, an additional analgesic was administered (Buprenorphine, 0.1 mg/kg, sc,  
421 Bayer, Leverkusen, Germany) and the animal's head was shaved and thoroughly disinfected  
422 using iodine solution (Braun, Melsungen, Germany). Before performing a scalp incision  
423 along the midline, a local analgesic was delivered (Lidocaine hydrochloride, sc, bela-pharm,  
424 Vechta, Germany). The skin covering the skull was partially removed and cleaned from  
425 tissue residues with a drop of H<sub>2</sub>O<sub>2</sub> (3%, AppliChem, Darmstadt, Germany). Using four  
426 reference points (bregma, lambda, and two points 2 mm to the left and to the right of  
427 the midline respectively), the animal's head was positioned into a skull-flat configuration.  
428 The exposed skull was covered with OptiBond FL primer and adhesive (Kerr dental, Ras-  
429 tatt, Germany) omitting three locations: V1 (AP: -2.8 mm, ML: -2.5 mm), dLGN (AP:  
430 -2.3 mm, ML: -2 mm), and a position roughly 1.5 mm anterior and 1 mm to the right  
431 of bregma, designated for a miniature reference screw (00-96 X 1/16 stainless steel screws,  
432 Bilaney) soldered to a custom-made connector pin. 2 μL of the adeno-associated viral vec-  
433 tor rAAV9/1.EF1a.DIO.hChR2(H134R)-eYFP.WPRE.hGH (Addgene, #20298-AAV9) was  
434 dyed with 0.3 μL fast green (Sigma-Aldrich, St. Louis, USA). After performing a small  
435 craniotomy over V1, a total of ~0.5 μL of this mixture was injected across the entire depth  
436 of cortex (0.05 μL injected every 100 μm, starting at 1000 μm and ending at 100 μm below  
437 the brain surface), using a glass pipette mounted on a Hamilton syringe (SYR 10 μL 1701  
438 RN no NDL, Hamilton, Bonaduz, Switzerland). A custom-made lightweight stainless steel  
439 head bar was positioned over the posterior part of the skull such that the round opening  
440 contained in the bar was centered on V1/dLGN and attached with dental cement (Ivoclar  
441 Vivadent, Ellwangen, Germany) to the primer/adhesive. The opening was later filled with  
442 the silicone elastomer sealant Kwik-Cast (WPI Germany, Berlin, Germany). At the end of  
443 the procedure, an antibiotic ointment (Imax, Merz Pharmaceuticals, Frankfurt, Germany)  
444 was applied to the edges of the wound and a long-term analgesic (Meloxicam, 2 mg/kg, sc,  
445 Böhlinger Ingelheim, Ingelheim, Germany) was administered and continued to be adminis-  
446 tered for 3 consecutive days. For at least 5 days post-surgery, the animal's health status was  
447 assessed via a score sheet. After at least 1 week of recovery, animals were gradually habitu-  
448 ated to the experimental setup by first handling them and then simulating the experimental  
449 procedure. To allow for virus expression, neural recordings started no sooner than 3 weeks  
450 after injection. On the day prior to the first day of recording, mice were fully anesthetized us-  
451 ing the same procedures as described for the initial surgery, and a craniotomy (ca. 1.5 mm<sup>2</sup>)  
452 was performed over dLGN and V1 and re-sealed with Kwik-Cast (WPI Germany, Berlin,  
453 Germany). As long as the animals did not show signs of discomfort, the long-term analgesic  
454 Metacam was administered only once at the end of surgery, to avoid any confounding effect  
455 on experimental results. Recordings were performed daily and continued for as long as the  
456 quality of the electrophysiological signals remained high.

#### 457 *Electrophysiological recordings, optogenetic suppression of V1, perfusion*

458 Head-fixed mice were placed on an air-cushioned Styrofoam ball, which allowed the ani-  
459 mal to freely move. Two optical computer mice interfaced with a microcontroller (Arduino

460 Duemilanove) sampled ball movements at 90 Hz. To record eye position and pupil size, the  
461 animal's eye was illuminated with infrared light and monitored using a zoom lens (Nav-  
462 itar Zoom 6000) coupled with a camera (Guppy AVT camera; frame rate 50 Hz, Allied  
463 Vision, Exton, USA). Extracellular signals were recorded at 30 kHz (Blackrock microsyste-  
464 ms). For each recording session, the silicon plug sealing the craniotomy was removed. For  
465 V1 recordings, a 32 or 64 channel silicon probe (Neuronexus, A1x32-5mm-25-177 or A1x64-  
466 Poly2-6mm-23s-160) was lowered into the brain to a median depth of 1100  $\mu\text{m}$ . For dLGN  
467 recordings, a 32 channel linear silicon probe (Neuronexus A1x32Edge-5mm-20-177-A32, Ann  
468 Arbor, USA) was lowered to a depth of  $\sim 2700\text{--}3700$   $\mu\text{m}$  below the brain surface. We judged  
469 recording sites to be located in dLGN based on the characteristic progression of RFs from  
470 upper to lower visual field along the electrode shank [57] (**Fig. S1b**), the presence of re-  
471 sponses strongly modulated at the temporal frequency of the drifting gratings (F1 response),  
472 and the preference of responses to high temporal frequencies [57, 93]. For *post hoc* histo-  
473 logical reconstruction of the recording site, the electrode was stained with DiI (Invitrogen,  
474 Carlsbad, USA) for one of the final recording sessions.

475 For photostimulation of V1 PV+ inhibitory interneurons, an optic fiber (910  $\mu\text{m}$  diameter,  
476 Thorlabs, Newton, USA) was coupled to a light-emitting diode (LED, center wavelength  
477 470 nm, M470F1, Thorlabs, Newton, USA) and positioned with a micromanipulator less  
478 than 1 mm above the exposed surface of V1. A black metal foil surrounding the tip of the  
479 head bar holder prevented the photostimulation light from reaching the animal's eyes. To  
480 ensure that the photostimulation was effective, the first recording session for each mouse  
481 was carried out in V1. Only if the exposure to light reliably induced suppression of V1  
482 activity was the animal used for subsequent dLGN recordings. For both movie clips and  
483 drifting gratings, photostimulation started 0.25 s before stimulus onset and ended 0.5 s after  
484 stimulus offset. LED light intensity was adjusted on a daily basis to evoke reliable effects  
485 (median intensity: 27.5  $\text{mW}/\text{cm}^2$ ) as measured at the tip of the optic fiber. Since the tip of  
486 the fiber never directly touched the surface of the brain, and since the clarity of the surface of  
487 the brain varied (generally decreasing every day following the craniotomy), the light intensity  
488 delivered even to superficial layers of V1 was inevitably lower. Importantly, changes in dLGN  
489 firing rates induced by V1 suppression (FMI, see below) did not differ, on average, from those  
490 induced by behavioral state (RMI, see below) (firing rate: FMI 0.20 vs. RMI 0.15, LMM:  
491  $F_{1,145.7} = 3.02$ ,  $p = 0.08$ ; burst ratio: FMI  $-0.27$  vs. RMI  $-0.28$ ,  $F_{1,124.0} = 0.002$ ,  $p = 0.97$ ;  
492 sparseness: FMI  $-0.12$  vs. RMI  $-0.14$ ,  $F_{1,144.9} = 1.03$ ,  $p = 0.31$ ; reliability: FMI  $-0.084$  vs.  
493  $-0.037$ ,  $F_{1,183.0} = 1.96$ ,  $p = 0.16$ ; **Fig. 6a**), indicating that optogenetic stimulation effects  
494 were not outside the physiological range.

495 After the final recording session, mice were first administered an analgesic (Metamizole,  
496 200 mg/kg, sc, MSD Animal Health, Brussels, Belgium) and following a 30 min latency  
497 period were transcardially perfused under deep anesthesia using a cocktail of Medetomidin  
498 (0.5 ml/kg) Midazolam (1 ml/kg) and Fentanyl (1 ml/kg) (ip). Perfusion was first done  
499 with Ringer's lactate solution followed by 4% paraformaldehyde (PFA) in 0.2 M sodium  
500 phosphate buffer (PBS).

### 501 *Histology*

502 To verify recording site and virus expression, we performed histological analyses. Brains  
503 were removed, postfixed in PFA for 24 h, and then rinsed with and stored in PBS at 4°



504 C. Slices (40  $\mu\text{m}$ ) were cut using a vibrotome (Leica VT1200 S, Leica, Wetzlar, Germany),  
505 mounted on glass slides with Vectashield DAPI (Vector Laboratories, Burlingame, USA),  
506 and coverslipped. A fluorescent microscope (BX61 Systems Microscope, Olympus, Tokyo,  
507 Japan) was used to inspect slices for the presence of yellow fluorescent protein (eYFP) and  
508 DiI. Recorded images were processed using FIJI [94, 95].

### 509 *Visual stimulation*

510 Visual stimuli were presented on a liquid crystal display (LCD) monitor (Samsung Sync-  
511 Master 2233RZ; mean luminance 50  $\text{cd}/\text{m}^2$ , 60 Hz) positioned at 25 cm distance from the  
512 animal's right eye using custom written software (EXPO, <https://sites.google.com/a/nyu.edu/expo/home>). The display was gamma-corrected for the presentation of artificial stimuli,  
513 but not for movies (see below).  
514

515 To measure receptive fields (RFs), we mapped the ON and OFF subfields with a sparse  
516 noise stimulus. The stimulus consisted of nonoverlapping white and black squares on a  
517 square grid, each flashed for 200 ms. For dLGN recordings, the square grid spanned  $60^\circ$  on  
518 a side, while individual squares spanned  $5^\circ$  on a side. For subsequent choices of stimuli, RF  
519 positions and other tuning preferences were determined online after each experiment based  
520 on multiunit activity, i.e. high-pass filtered signals crossing a threshold of 4.5 to 6.5 SD.

521 We measured single unit orientation preference by presenting full-field, full-contrast drift-  
522 ing sinusoidal gratings of 12 different, pseudo-randomly interleaved orientations ( $30^\circ$  steps).  
523 For dLGN recordings, spatial frequency was either 0.02  $\text{cyc}/^\circ$  (3 experiments) or 0.04  $\text{cyc}/^\circ$   
524 (8 experiments) and temporal frequency was either 2 Hz (2 experiments) or 4 Hz (9 ex-  
525 periments). One blank condition (i.e., mean luminance gray screen) was included to allow  
526 measurements of baseline activity. The stimulus duration was 2 s, with an interstimulus  
527 interval (ISI) of 2.4 s.

528 For laminar localization of neurons recorded in V1, we presented a full-field, contrast-  
529 reversing checkerboard at 100% contrast, with a spatial frequency of either 0.01  $\text{cyc}/^\circ$  (2  
530 experiments) or 0.02  $\text{cyc}/^\circ$  (5 experiments) and a temporal frequency of 0.5  $\text{cyc}/\text{s}$ .

531 Movies were acquired using a hand-held consumer-grade digital camera (Canon Power-  
532 Shot SD200) at a resolution of  $320 \times 240$  pixels and 60 frames/s. Movies were filmed close to  
533 the ground in a variety of wooded or grassy locations in Vancouver, BC, and contained little  
534 to no forward/backward optic flow, but did contain simulated gaze shifts (up to  $275^\circ/\text{s}$ ),  
535 generated by manual camera movements (for example movies, see **Fig. S5**). Focus was kept  
536 within 2 m and exposure settings were set to automatic. The horizontal angle subtended by  
537 the camera lens was  $51.6^\circ$ . No display gamma correction was used while presenting movies,  
538 since consumer-grade digital cameras are already gamma corrected for consumer displays  
539 [96]. For presentation, movies were cut into 5 s clips and converted from color to grayscale.  
540 Movie clips were presented with an ISI of 1.25 s (32 experiments).

### 541 *Spike sorting*

542 To obtain single unit activity from extracellular recordings, we used the open source,  
543 Matlab-based, automated spike sorting toolbox Kilosort [97]. Resulting clusters were man-  
544 ually refined using Spyke [98], a Python application that allows the selection of channels  
545 and time ranges around clustered spikes for realignment, as well as representation in 3D

546 space using dimension reduction (multichannel PCA, ICA, and/or spike time). In 3D, clus-  
547 ters were then further split via a gradient-ascent based clustering algorithm (GAC) [99].  
548 Exhaustive pairwise comparisons of similar clusters allowed the merger of potentially over-  
549 clustered units. For subsequent analyses, we inspected autocorrelograms and mean voltage  
550 traces, and only considered units that displayed a clear refractory period and a distinct spike  
551 waveshape. All further analyses were carried out using the DataJoint framework [100] with  
552 custom-written code in Python.

### 553 *Response characterization*

554 We used current source density (CSD) analysis for recordings in area V1 to determine  
555 the laminar position of electrode contacts. To obtain the LFP data we first down-sampled  
556 the signal to 1 kHz before applying a bandpass filter (4–90 Hz, 2<sup>nd</sup>-order Butterworth filter).  
557 We computed the CSD from the second spatial derivative of the local field potentials [101],  
558 and assigned the base of layer 4 to the contact that was closest to the earliest CSD polarity  
559 inversion. The remaining contacts were assigned to supragranular, granular and infragranular  
560 layers, assuming a thickness of  $\sim 1$  mm for mouse visual cortex [102].

561 In recordings targeting dLGN, we used the envelope of multi-unit spiking activity (MUAe)  
562 [103] to determine RF progression (**Fig. S1b**). Briefly, we full-wave rectified the high-pass  
563 filtered signals (cutoff frequency: 300 Hz, 4<sup>th</sup>-order non-causal Butterworth filter) before  
564 performing common average referencing by subtracting the median voltage across all channels  
565 in order to eliminate potential artifacts (e.g. movement artifacts). We then applied a low-  
566 pass filter (cutoff frequency: 500 Hz, Butterworth filter) and down-sampled the signal to  
567 2 kHz. Recording sessions for which RFs did not show the retinotopic progression typical of  
568 dLGN (**Fig. S1b**) [57] were excluded from further analysis.

569 Each unit’s peristimulus time histogram (PSTH, i.e., the response averaged over trials)  
570 was calculated by convolving a Gaussian of width  $2\sigma = 20$  ms with the spike train collapsed  
571 across all trials, separately for each condition.

572 We defined bursts according to [44], which required a silent period of at least 100 ms before  
573 the first spike in a burst, followed by a second spike with an interspike interval  $< 4$  ms. Any  
574 subsequent spikes with preceding interspike intervals  $< 4$  ms were also considered to be part  
575 of the burst. All other spikes were regarded as tonic. We computed a burst ratio (the number  
576 of burst spikes divided by the total number of spikes) and compared this ratio in conditions  
577 with CT feedback intact vs. V1 suppression or during locomotion vs. stationary conditions.  
578 PSTHs for burst spikes were calculated by only considering spikes that were part of bursts  
579 before collapsing across trials and convolving with the Gaussian kernel (see above). PSTHs  
580 for non-burst spikes were calculated in an analogous way.

581 To quantify the effect of V1 suppression on various response properties, we defined the  
582 feedback modulation index (FMI) as

$$\text{FMI} = \frac{\text{feedback} - \text{suppression}}{\text{feedback} + \text{suppression}} \quad (1)$$

583 *Characterization of responses to naturalistic movie clips*

584 Signal to noise ratio (SNR) was calculated according to [104] by

$$\text{SNR} = \frac{\text{Var}[\langle C_r \rangle_t]}{\langle \text{Var}[C]_t \rangle_r} \quad (2)$$

585 where  $C$  is the  $T$  by  $R$  response matrix (time samples by stimulus repetitions) and  $\langle \rangle_x$  and  
586  $\text{Var}[\ ]_x$  denote the mean and variance across the indicated dimension, respectively. If all trials  
587 were identical such that the mean response was a perfect representative of the response, SNR  
588 would equal 1.

589 The sparseness  $S$  of a PSTH was calculated according to [54] by

$$S = \left( 1 - \frac{\left( \sum_{i=1}^n r_i/n \right)^2}{\sum_{i=1}^n r_i^2/n} \right) \left( \frac{1}{1 - 1/n} \right) \quad (3)$$

590 where  $r_i \geq 0$  is the signal value in the  $i^{\text{th}}$  time bin, and  $n$  is the number of time bins.  
591 Sparseness ranges from 0 to 1, with 0 corresponding to a uniform signal, and 1 corresponding  
592 to a signal with all of its energy in a single time bin.

593 Response reliability was quantified according to [55] as the mean pairwise correlation  
594 of all trial pairs of a unit's single trial responses. Single trial responses were computed by  
595 counting spikes in 20 ms, overlapping time bins at 1 ms resolution. Pearson's correlation was  
596 calculated between all possible pairs of trials, and then averaged across trials per condition.

597 To detect response peaks in trial raster plots and measure their widths, clustering of spike  
598 times collapsed across trials was performed using the gradient ascent clustering (GAC) algo-  
599 rithm [99], with a characteristic neighborhood size of 20 ms. Spike time clusters containing  
600 less than 5 spikes were discarded. The center of each detected cluster of spike times was  
601 matched to the nearest peak in the PSTH. A threshold of  $\theta = b + 3$  Hz was applied to the  
602 matching PSTH peak, where  $b = 2 \text{median}(x)$  is the baseline of each PSTH  $x$ . Peaks in the  
603 PSTH that fell below  $\theta$  were discarded, and all others were kept as valid peaks. Peak widths  
604 were measured as the temporal separation of the middle 68% (16th to 84th percentile) of  
605 spike times within each cluster.

606 To determine whether V1 suppression changes dLGN responses in a divisive or subtractive  
607 manner, we fit a threshold-linear model using repeated random subsampling cross-validation.  
608 To this end, we first selected a random set of 50% of the trials for each condition for fitting  
609 to the timepoint-by-timepoint responses a threshold linear model given by  $r_{supp} = s r_{fb} + b$ ,  
610 where  $r_{supp} > 0$ , with  $s$  representing the slope and  $b$  the offset. Fitting was done using  
611 non-linear least squares (`scipy.optimize.curve_fit`). Throughout **Fig. 2**, we report the  
612 resulting  $x$ -intercept as the threshold. We evaluated goodness of fit ( $R^2$ ) for the other 50% of  
613 trials not used for fitting. We repeated this procedure 1000 times and considered threshold  
614 and slope as significant if the central 95% of their distribution did not include 0 and 1,  
615 respectively.

### 616 *Characterization of responses to drifting gratings*

617 For display of spike rasters (**Fig. 3**), trials were sorted by condition. We computed  
618 orientation tuning curves by fitting a sum of two Gaussians of the same width with peaks  
619  $180^\circ$  apart:

$$R(\theta) = R_0 + R_p e^{-\frac{(\theta - \theta_p)^2}{2\sigma^2}} + R_n e^{-\frac{(\theta - \theta_p + 180)^2}{2\sigma^2}} \quad (4)$$

620 In this expression,  $\theta$  is stimulus orientation ( $0$ – $360^\circ$ ). The function has five parameters:  
621 preferred orientation  $\theta_p$ , tuning width  $\sigma$ , baseline response  $R_0$ , response at the preferred  
622 orientation  $R_p$ , and response at the null orientation  $R_n$ .

623 Orientation selectivity was quantified according to [41, 105] as

$$\text{OSI} = \frac{\sqrt{(\sum r_k \sin(2\theta_k))^2 + (\sum r_k \cos(2\theta_k))^2}}{\sum r_k} \quad (5)$$

624 where  $r_k$  is the response to the  $k$ th direction given by  $\theta_k$ . We determined OSI for each unit  
625 during both feedback and suppression conditions.

626 We computed the first harmonic of the response  $r$  from the spike trains according to [62]  
627 to obtain the amplitude and phase of the best-fitting sinusoid, which has the same temporal  
628 frequency as the stimulus. For each trial, we calculated

$$r = (1/D) \sum_k \cos(2\pi f t_k) + i \sin(2\pi f t_k) \quad (6)$$

629 where  $D$  is the stimulus duration,  $f$  is the temporal frequency of the stimulus, and the  $t_k$   
630 are the times of the individual spikes. We excluded the first cycle to avoid contamination  
631 by the onset response. For (**Fig. 3g**), we calculated average amplitude  $F_1$  by obtaining  
632 the absolute value of the complex number  $r$  on each trial, before averaging across trials, to  
633 avoid potential confounds due to differences in response phase across conditions. For the  
634 comparison of response phase, we focused on the orientation which elicited the maximal  
635 cycle average response across both feedback and suppression conditions.

### 636 *Exclusion criteria*

637 Neurons with mean evoked firing rates  $< 0.01$  spikes/s were excluded from further anal-  
638 ysis. For movie clips, only neurons with  $\text{SNR} \geq 0.015$  in at least one of the conditions in an  
639 experiment were considered. Of this population, 2 neurons were excluded from the analysis  
640 of the parameters returned by the threshold linear model, because their  $R^2$  was  $< 0$ . For  
641 gratings, we converted firing rates in response to each orientation to z-scores relative to re-  
642 sponses to the mean luminance gray screen. We only considered visually responsive neurons,  
643 which had a z-scored response  $\geq 2.5$  to at least 1 orientation. For the analysis of response  
644 phase, we only considered neurons with a peak of the cycle average response of at least 10 Hz  
645 in both feedback and suppression conditions, and an  $F_1/F_0$  ratio of at least 0.25.

### 646 *Locomotion*

647 We used the Euclidean norm of three perpendicular components of ball velocity (roll,  
648 pitch and yaw) to compute animal running speed. For the analysis of neural responses as a  
649 function of behavioral state, locomotion trials were defined as those for which speed exceeded

650 1 cm/s for at least 50% of the stimulus presentation, and stationary trials as those for which  
651 speed fell below 0.25 cm/s for at least 50% of the stimulus presentation. To quantify the  
652 effect of running vs. sitting on various response properties, the run modulation index (RMI)  
653 was defined as

$$\text{RMI} = \frac{\text{running} - \text{sitting}}{\text{running} + \text{sitting}} \quad (7)$$

#### 654 *Eye Tracking*

655 The stimulus viewing eye was filmed using an infrared camera under infrared LED il-  
656 lumination. Pupil position was extracted from the videos using a custom, semi-automated  
657 algorithm. Briefly, each video frame was equalized using an adaptive bi-histogram equal-  
658 ization procedure, and then smoothed using a median and bilateral filters. The center of  
659 the pupil was detected by taking the darkest point in a convolution of the filtered image  
660 with a black square. Next, the peaks of the image gradient along lines extending radially  
661 from the center point were used to define the pupil contour. Lastly, an ellipse was fit to  
662 the contour, and the center of this ellipse was taken as the position of the pupil. A similar  
663 procedure was used to extract the position of the corneal reflection (CR) of the LED illumi-  
664 nation. Eye blinks were automatically detected and the immediately adjacent data points  
665 were excluded. Adjustable algorithm parameters were set manually for each experiment.  
666 Output pupil position time-courses were lightly smoothed, and unreliable segments were au-  
667 tomatically removed according to *a priori* criteria. Finally, the CR position was subtracted  
668 from the pupil position to eliminate translational eye movements, and pupil displacement in  
669 degrees relative to the baseline (median) position was determined by

$$\theta = 2 \frac{\arcsin(d/2)}{r} \quad (8)$$

670 where  $d$  is the distance between the pupil and the baseline position, and  $r = 1.25$  mm is the  
671 radius of the eye [106]. Angular displacement was computed separately for  $x$  and  $y$  directions  
672 and then combined geometrically to give the final measure of distance from baseline.

#### 673 *Statistical methods*

674 To assess statistical significance, we fitted and examined multilevel linear models [107].  
675 Such models take into account the hierarchical structure present in our data (i.e., neurons  
676 nested in experiments, experiments nested in recording sessions, recordings sessions nested  
677 in animals), and eliminate the detrimental effect of structural dependencies on the likelihood  
678 of Type I errors (false positive reports) [108]. By considering the nested structure of the  
679 data, multilevel models also eliminate the need for “pre-selecting” data sets, such as one  
680 out of several experiments repeatedly performed on the same neurons. Whenever we have  
681 several experiments per neuron, we include all of them, and also show them in the scatter  
682 plots (“observations”). We provide the sample size for each analysis in **Table 1**. In fitting  
683 the models, we accounted for repeated measures by including random effects for animals,  
684 recording sessions, experiments, and neurons. We fit these models in R [109], using the  
685 *lme4* package [110]. We estimated F-values, their degrees of freedom, and the corresponding  
686 p-values using the Satterthwaite approximation [111] implemented by the *lmerTest* package



687 [112]. Throughout, uncertainty in estimated regression slopes is represented as  $slope \pm x$ ,  
688 where  $x$  is  $2 \times$  the estimated standard error of the slope.

|                                                        | Observations | Neurons | Mice |
|--------------------------------------------------------|--------------|---------|------|
| Figure 1f                                              | 118          | 64      | 6    |
| Figure 1g                                              | 117          | 63      | 6    |
| Figure 1h–j                                            | 118          | 64      | 6    |
| Figure 2e,h                                            | 114          | 62      | 6    |
| Figure 2f                                              | 113          | 61      | 6    |
| Figure 2g                                              | 113          | 62      | 6    |
| Figure 3c–e                                            | 57           | 44      | 4    |
| Figure 3f                                              | 27           | 26      | 4    |
| Figure 3g                                              | 57           | 44      | 4    |
| Figure 3h,i                                            | 40           | 33      | 3    |
| Figure 4a                                              | 36           | 36      | 3    |
| Figure 4b                                              | 34           | 34      | 3    |
| Figure 5c,e                                            | 129          | 65      | 6    |
| Figure 5d                                              | 124          | 63      | 6    |
| Figure 5f                                              | 128          | 65      | 6    |
| Figure 6a <sub>1</sub> ,a <sub>3</sub> ,a <sub>4</sub> | 109          | 59      | 6    |
| Figure 6a <sub>2</sub>                                 | 101          | 56      | 6    |
| Figure 6b <sub>1</sub> ,b <sub>3</sub>                 | 126          | 64      | 6    |
| Figure 6b <sub>2</sub>                                 | 109          | 58      | 6    |
| Figure 6b <sub>4</sub>                                 | 111          | 63      | 6    |
| Figure 6c <sub>1</sub> ,c <sub>3</sub>                 | 123          | 63      | 6    |
| Figure 6c <sub>2</sub>                                 | 110          | 58      | 6    |
| Figure 6c <sub>4</sub>                                 | 109          | 62      | 6    |
| Figure S2a,c,e                                         | 118          | 64      | 6    |
| Figure S2b,f                                           | 108          | 57      | 6    |
| Figure S2d                                             | 117          | 63      | 6    |
| Figure S3a,b                                           | 118          | 64      | 6    |
| Figure S3c,d                                           | 39           | 39      | 4    |
| Figure S4a,d                                           | 129          | 65      | 6    |
| Figure S4b                                             | 102          | 56      | 6    |
| Figure S4c                                             | 107          | 57      | 6    |
| Figure S4e,g                                           | 125          | 65      | 6    |

**Table 1** Breakdown of sample sizes (N) for the analyses of neural data. See text for details.

## 689 References

- 690 1. Lien, A.D. and Scanziani, M. (2018). Cortical direction selectivity emerges at conver-  
691 gence of thalamic synapses. *Nature* *558*, 80–86.
- 692 2. Hubel, D.H. and Wiesel, T.N. (1962). Receptive fields, binocular interaction and func-  
693 tional architecture in the cat’s visual cortex. *Journal of Physiology* *160*, 106–154.
- 694 3. Chance, F.S., Nelson, S.B., and Abbott, L.F. (1999). Complex cells as cortically am-  
695 plified simple cells. *Nat Neurosci* *2*, 277–282.
- 696 4. Riesenhuber, M. and Poggio, T. (1999). Hierarchical models of object recognition in  
697 cortex. *Nature Neuroscience* *2*, 1019.
- 698 5. Riesenhuber, M. and Poggio, T. (2000). Models of object recognition. *Nature Neuro-*  
699 *science* *3*, 1199–1204.
- 700 6. DiCarlo, J.J., Zoccolan, D., and Rust, N.C. (2012). How Does the Brain Solve Visual  
701 Object Recognition? *Neuron* *73*, 415–434.
- 702 7. Squire, R.F., Noudoost, B., Schafer, R.J., and Moore, T. (2013). Prefrontal contribu-  
703 tions to visual selective attention. *Annual Review of Neuroscience* *36*, 451–466.
- 704 8. Roelfsema, P.R. and de Lange, F.P. (2016). Early Visual Cortex as a Multiscale Cog-  
705 nitive Blackboard. *Annual Review of Vision Science* *2*, 131–151.
- 706 9. Bastos, A.M., Usrey, W.M., Adams, R.A., Mangun, G.R., Fries, P., and Friston, K.J.  
707 (2012). Canonical microcircuits for predictive coding. *Neuron* *76*, 695–711.
- 708 10. Lamme, V.A.F. and Roelfsema, P.R. (2000). The distinct modes of vision offered by  
709 feedforward and recurrent processing. *Trends in Neurosciences* *23*, 571–579.
- 710 11. Takahashi, N., Oertner, T.G., Hegemann, P., and Larkum, M.E. (2016). Active cortical  
711 dendrites modulate perception. *Science* *354*, 1587.
- 712 12. Larkum, M. (2013). A cellular mechanism for cortical associations: An organizing prin-  
713 ciple for the cerebral cortex. *Trends in Neurosciences* *36*, 141–151.
- 714 13. Heeger, D.J. (2017). Theory of cortical function. *Proceedings of the National Academy*  
715 *of Sciences* *114*, 1773–1782.
- 716 14. Gilbert, C.D. and Li, W. (2013). Top-down influences on visual processing. *Nature*  
717 *Reviews Neuroscience* *14*, 350–63.
- 718 15. Sherman, S.M. and Guillery, R.W. (2002). The role of the thalamus in the flow of  
719 information to the cortex. *Philosophical Transactions of the Royal Society B: Biological*  
720 *Sciences* *357*, 1695–708.
- 721 16. Briggs, F. (2010). Organizing principles of cortical layer 6. *Frontiers in Neural Circuits*  
722 *4*, 3.

- 723 17. Sillito, A.M. and Jones, H.E. (2002). Corticothalamic interactions in the transfer of  
724 visual information. *Philosophical Transactions of the Royal Society of London B: Bio-*  
725 *logical Sciences* *357*, 1739–1752.
- 726 18. Vélez-Fort, M., Rousseau, C.V., Niedworok, C.J., Wickersham, I.R., Rancz, E.A.,  
727 Brown, A.P.Y., Strom, M., and Margrie, T.W. (2014). The stimulus selectivity and  
728 connectivity of layer six principal cells reveals cortical microcircuits underlying visual  
729 processing. *Neuron* *83*, 1431–43.
- 730 19. Stoelzel, C.R., Bereshpolova, Y., Alonso, J.M., and Swadlow, H.A. (2017). Axonal  
731 Conduction Delays, Brain State, and Corticogeniculate Communication. *Journal of*  
732 *Neuroscience* *37*, 6342–6358.
- 733 20. Crandall, S.R., Patrick, S.L., Cruikshank, S.J., and Connors, B.W. (2017). Infrabarrels  
734 Are Layer 6 Circuit Modules in the Barrel Cortex that Link Long-Range Inputs and  
735 Outputs. *Cell Reports* *21*, 3065–3078.
- 736 21. Oberlaender, M., de Kock, C.P.J., Bruno, R.M., Ramirez, A., Meyer, H.S., Der-  
737 cksen, V.J., Helmstaedter, M., and Sakmann, B. (2012). Cell Type-Specific Three-  
738 Dimensional Structure of Thalamocortical Circuits in a Column of Rat Vibrissal Cor-  
739 tex. *Cerebral Cortex* *22*, 2375–2391.
- 740 22. Swadlow, H.A. (1989). Efferent neurons and suspected interneurons in S-1 vibrissa  
741 cortex of the awake rabbit: Receptive fields and axonal properties. *Journal of Neuro-*  
742 *physiology* *62*, 288–308.
- 743 23. Pauzin, F.P. and Krieger, P. (2018). A Corticothalamic Circuit for Refining Tactile  
744 Encoding. *Cell Reports* *23*, 1314–1325.
- 745 24. Andermann, M.L., Gilfoy, N.B., Goldey, G.J., Sachdev, R.N.S., Wölfel, M., McCormick,  
746 D.A., Reid, R.C., and Levene, M.J. (2013). Chronic cellular imaging of entire cortical  
747 columns in awake mice using microprisms. *Neuron* *80*, 900–13.
- 748 25. Denman, D.J. and Contreras, D. (2015). Complex effects on in vivo visual responses  
749 by specific projections from mouse cortical layer 6 to dorsal lateral geniculate nucleus.  
750 *J Neurosci* *35*, 9265–9280.
- 751 26. Sherman, S.M. and Guillery, R.W. (1998). On the actions that one nerve cell can have  
752 on another: Distinguishing “drivers” from “modulators”. *Proceedings of the National*  
753 *Academy of Sciences* *95*, 7121–7126.
- 754 27. Godwin, D.W., Horn, S.C.V., Erişir, A., Sesma, M., Romano, C., and Sherman, S.M.  
755 (1996). Ultrastructural Localization Suggests that Retinal and Cortical Inputs Access  
756 Different Metabotropic Glutamate Receptors in the Lateral Geniculate Nucleus. *Journal*  
757 *of Neuroscience* *16*, 8181–8192.
- 758 28. Usrey, M.W. and Murray, S.S. (2018). Corticofugal circuits: Communication lines from  
759 the cortex to the rest of the brain. *Journal of Comparative Neurology* *0*.

- 760 29. Crandall, S.R., Cruikshank, S.J., and Connors, B.W. (2015). A corticothalamic switch:  
761 controlling the thalamus with dynamic synapses. *Neuron* 86, 768–782.
- 762 30. Briggs, F. and Usrey, W.M. (2008). Emerging views of corticothalamic function. *Curr*  
763 *Opin Neurobiol* 18, 403–407.
- 764 31. Briggs, F. and Usrey, W.M. (2011). Corticogeniculate feedback and visual processing  
765 in the primate. *Journal of Physiology* 589, 33–40.
- 766 32. Andolina, I.M., Jones, H.E., and Sillito, A.M. (2013). Effects of cortical feedback on  
767 the spatial properties of relay cells in the lateral geniculate nucleus. *Journal of Neuro-*  
768 *physiology* 109, 889–899.
- 769 33. Cudeiro, J. and Sillito, A.M. (1996). Spatial frequency tuning of orientation-  
770 discontinuity-sensitive corticofugal feedback to the cat lateral geniculate nucleus. *The*  
771 *Journal of Physiology* 490 ( Pt 2), 481–492.
- 772 34. Murphy, P.C. and Sillito, A.M. (1987). Corticofugal feedback influences the generation  
773 of length tuning in the visual pathway. *Nature* 329, 727.
- 774 35. Webb, B.S., Tinsley, C.J., Barraclough, N.E., Easton, A., Parker, A., and Derrington,  
775 A.M. (2002). Feedback from V1 and inhibition from beyond the classical receptive field  
776 modulates the responses of neurons in the primate lateral geniculate nucleus. *Visual*  
777 *Neuroscience* 19, 583–592.
- 778 36. Nolt, M.J., Kumbhani, R.D., and Palmer, L.A. (2007). Suppression at High Spatial  
779 Frequencies in the Lateral Geniculate Nucleus of the Cat. *J Neurophysiol* 98, 1167–  
780 1180.
- 781 37. Hasse, J.M. and Briggs, F. (2017). Corticogeniculate feedback sharpens the tempo-  
782 ral precision and spatial resolution of visual signals in the ferret. *Proceedings of the*  
783 *National Academy of Sciences* 114, E6222–E6230.
- 784 38. Rivadulla, C., Martínez, L.M., Varela, C., and Cudeiro, J. (2002). Completing the  
785 corticofugal loop: A visual role for the corticogeniculate type 1 metabotropic glutamate  
786 receptor. *Journal of Neuroscience* 22, 2956–2962.
- 787 39. Jones, H.E., Andolina, I.M., Ahmed, B., Shipp, S.D., Clements, J.T.C., Grieve, K.L.,  
788 Cudeiro, J., Salt, T.E., and Sillito, A.M. (2012). Differential feedback modulation of  
789 center and surround mechanisms in parvocellular cells in the visual thalamus. *The*  
790 *Journal of Neuroscience: The Official Journal of the Society for Neuroscience* 32, 15946–  
791 15951.
- 792 40. Andolina, I.M., Jones, H.E., Wang, W., and Sillito, A.M. (2007). Corticothalamic feed-  
793 back enhances stimulus response precision in the visual system. *Proceedings of the*  
794 *National Academy of Sciences of the United States of America* 104, 1685–1690.
- 795 41. Olsen, S.R., Bortone, D.S., Adesnik, H., and Scanziani, M. (2012). Gain control by  
796 layer six in cortical circuits of vision. *Nature* 483, 47.

- 797 42. Przybyszewski, A.W., Gaska, J.P., Foote, W., and Pollen, D.A. (2000). Striate cortex  
798 increases contrast gain of macaque LGN neurons. *Visual Neuroscience* *17*, 485–494.
- 799 43. Wörgötter, F., Eyding, D., Macklis, J.D., and Funke, K. (2002). The influence of the  
800 corticothalamic projection on responses in thalamus and cortex. *Philosophical Trans-*  
801 *actions of the Royal Society of London. Series B: Biological Sciences* *357*, 1823–1834.
- 802 44. Wang, W., Jones, H.E., Andolina, I.M., Salt, T.E., and Sillito, A.M. (2006). Functional  
803 alignment of feedback effects from visual cortex to thalamus. *Nat Neurosci* *9*, 1330.
- 804 45. de Labra, C., Rivadulla, C., Grieve, K., Mariño, J., Espinosa, N., and Cudeiro, J.  
805 (2007). Changes in Visual Responses in the Feline dLGN: Selective Thalamic Sup-  
806 pression Induced by Transcranial Magnetic Stimulation of V1. *Cerebral Cortex* *17*,  
807 1376–1385.
- 808 46. Li, Y.T., Ibrahim, L.A., Liu, B.H., Zhang, L.I., and Tao, H.W. (2013). Linear trans-  
809 formation of thalamocortical input by intracortical excitation. *Nature Neuroscience* *16*,  
810 1324–30.
- 811 47. Lien, A.D. and Scanziani, M. (2013). Tuned thalamic excitation is amplified by visual  
812 cortical circuits. *Nature Neuroscience* *16*, 1315–23.
- 813 48. King, J.L., Lowe, M.P., Stover, K.R., Wong, A.A., and Crowder, N.A. (2016). Adaptive  
814 Processes in Thalamus and Cortex Revealed by Silencing of Primary Visual Cortex  
815 during Contrast Adaptation. *Current biology* *26*, 1295–1300.
- 816 49. Gulyás, B., Lagae, L., Eysel, U., and Orban, G.A. (1990). Corticofugal feedback in-  
817 fluences the responses of geniculate neurons to moving stimuli. *Experimental Brain*  
818 *Research* *79*, 441–446.
- 819 50. Poltoratski, S., Maier, A., Newton, A.T., and Tong, F. (2019). Figure-Ground Mod-  
820 ulation in the Human Lateral Geniculate Nucleus Is Distinguishable from Top-Down  
821 Attention. *Current Biology* *29*, 2051–2057.e3.
- 822 51. Makino, H. and Komiyama, T. (2015). Learning enhances the relative impact of top-  
823 down processing in the visual cortex. *Nature Neuroscience* *18*, 1116–1122.
- 824 52. Atallah, B.V., Bruns, W., Carandini, M., and Scanziani, M. (01 2012/01/12).  
825 Parvalbumin-Expressing Interneurons Linearly Transform Cortical Responses to Visual  
826 Stimuli. *Neuron* *73*, 159–170.
- 827 53. Sherman, S.M. (2016). Thalamus plays a central role in ongoing cortical functioning.  
828 *Nat Neurosci* *19*, 533–541.
- 829 54. Vinje, W.E. and Gallant, J.L. (2000). Sparse coding and decorrelation in primary visual  
830 cortex during natural vision. *Science* *287*, 1273–1276.
- 831 55. Goard, M. and Dan, Y. (2009). Basal forebrain activation enhances cortical coding of  
832 natural scenes. *Nat Neurosci* *12*, 1444–1449.



- 833 56. Sherman, S.M. (2001). Tonic and burst firing: dual modes of thalamocortical relay.  
834 *Trends Neurosci* *24*, 122–126.
- 835 57. Piscopo, D.M., El-Danaf, R.N., Huberman, A.D., and Niell, C.M. (2013). Diverse visual  
836 features encoded in mouse lateral geniculate nucleus. *Journal of Neuroscience* *33*, 4642–  
837 56.
- 838 58. Román Rosón, M., Bauer, Y., Kotkat, A.H., Berens, P., Euler, T., and Busse, L. (2019).  
839 Mouse dLGN Receives Functional Input from a Diverse Population of Retinal Ganglion  
840 Cells with Limited Convergence. *Neuron* *0*.
- 841 59. Marshel, J.H., Kaye, A.P., Nauhaus, I., and Callaway, E.M. (2012). Anterior-posterior  
842 direction opponency in the superficial mouse lateral geniculate nucleus. *Neuron* *76*,  
843 713–20.
- 844 60. Scholl, B., Tan, A.Y.Y., Corey, J., and Priebe, N.J. (2013). Emergence of orientation  
845 selectivity in the Mammalian visual pathway. *Journal of Neuroscience* *33*, 10616–24.
- 846 61. Skottun, B.C., De Valois, R.L., Grosf, D.H., Movshon, J.A., Albrecht, D.G., and  
847 Bonds, A.B. (1991). Classifying simple and complex cells on the basis of response  
848 modulation. *Vision Research* *31*, 1079–1086.
- 849 62. Carandini, M., Heeger, D.J., and Movshon, J.A. (1997). Linearity and Normalization  
850 in Simple Cells of the Macaque Primary Visual Cortex. *Journal of Neuroscience* *17*,  
851 8621–8644.
- 852 63. Erisken, S., Vaiceliunaite, A., Jurjut, O., Fiorini, M., Katzner, S., and Busse, L. (2014).  
853 Effects of Locomotion Extend throughout the Mouse Early Visual System. *Current*  
854 *Biology* *24*, 2899–2907.
- 855 64. Aydın, Ç., Couto, J., Giugliano, M., Farrow, K., and Bonin, V. (2018). Locomotion  
856 modulates specific functional cell types in the mouse visual thalamus. *Nature Commu-*  
857 *nications* *9*, 4882.
- 858 65. Williamson, R.S., Hancock, K.E., Shinn-Cunningham, B.G., and Polley, D.B. (2015).  
859 Locomotion and Task Demands Differentially Modulate Thalamic Audiovisual Process-  
860 ing during Active Search. *Current Biology* *25*, 1885–1891.
- 861 66. Niell, C.M. and Stryker, M.P. (02 2010/02/25). Modulation of Visual Responses by  
862 Behavioral State in Mouse Visual Cortex. *Neuron* *65*, 472–479.
- 863 67. Bennett, C., Arroyo, S., and Hestrin, S. (10 2013/10/16). Subthreshold Mechanisms  
864 Underlying State-Dependent Modulation of Visual Responses. *Neuron* *80*, 350–357.
- 865 68. Wiegert, J.S., Mahn, M., Prigge, M., Printz, Y., and Yizhar, O. (2017). Silencing  
866 Neurons: Tools, Applications, and Experimental Constraints. *Neuron* *95*, 504–529.
- 867 69. Mahn, M., Gibor, L., Patil, P., Malina, K.C.K., Oring, S., Printz, Y., Levy, R., Lampl,  
868 I., and Yizhar, O. (2018). High-efficiency optogenetic silencing with soma-targeted  
869 anion-conducting channelrhodopsins. *Nature Communications* *9*, 4125.

- 870 70. Bickford, M.E., Zhou, N., Krahe, T.E., Govindaiah, G., and Guido, W. (2015). Retinal  
871 and Tectal “Driver-Like” Inputs Converge in the Shell of the Mouse Dorsal Lateral  
872 Geniculate Nucleus. *Journal of Neuroscience* *35*, 10523–10534.
- 873 71. Ahmadlou, M., Tafreshiha, A., and Heimel, J.A. (2017). Visual Cortex Limits Pop-Out  
874 in the Superior Colliculus of Awake Mice. *Cerebral Cortex* *27*, 5772–5783.
- 875 72. Zhao, X., Liu, M., and Cang, J. (2014). Visual Cortex Modulates the Magnitude but  
876 Not the Selectivity of Looming-Evoked Responses in the Superior Colliculus of Awake  
877 Mice. *Neuron* *84*, 202–213.
- 878 73. Ahmadlou, M., Zweifel, L.S., and Heimel, J.A. (2018). Functional modulation of pri-  
879 mary visual cortex by the superior colliculus in the mouse. *Nature Communications* *9*,  
880 3895.
- 881 74. Dan, Y., Atick, J.J., and Reid, R.C. (1996). Efficient coding of natural scenes in the  
882 lateral geniculate nucleus: experimental test of a computational theory. *J Neurosci* *16*,  
883 3351–3362.
- 884 75. Lesica, N.A. and Stanley, G.B. (2004). Encoding of Natural Scene Movies by Tonic and  
885 Burst Spikes in the Lateral Geniculate Nucleus. *Journal of Neuroscience* *24*, 10731–  
886 10740.
- 887 76. Lesica, N.A., Weng, C., Jin, J., Yeh, C.I., Alonso, J.M., and Stanley, G.B. (2006).  
888 Dynamic Encoding of Natural Luminance Sequences by LGN Bursts. *PLoS Biology* *4*.
- 889 77. Wang, X., Wei, Y., Vaingankar, V., Wang, Q., Koepsell, K., Sommer, F.T., and Hirsch,  
890 J.A. (2007). Feedforward Excitation and Inhibition Evoke Dual Modes of Firing in the  
891 Cat’s Visual Thalamus during Naturalistic Viewing. *Neuron* *55*, 465–478.
- 892 78. Mante, V., Frazor, R.A., Bonin, V., Geisler, W.S., and Carandini, M. (2005). Inde-  
893 pendence of luminance and contrast in natural scenes and in the early visual system.  
894 *Nature Neuroscience* *8*, 1690–1697.
- 895 79. Berkes, P., Orbán, G., Lengyel, M., and Fiser, J. (01 2011/01/07). Spontaneous Cortical  
896 Activity Reveals Hallmarks of an Optimal Internal Model of the Environment. *Science*  
897 *331*, 83–87.
- 898 80. Lee, T.S. and Mumford, D. (2003). Hierarchical Bayesian inference in the visual cortex.  
899 *JOSA A* *20*, 1434–1448.
- 900 81. Rao, R.P.N. and Ballard, D.H. (1999). Predictive coding in the visual cortex: A func-  
901 tional interpretation of some extra-classical receptive-field effects. *Nature Neuroscience*  
902 *2*, 79.
- 903 82. Clark, A. (2013). Whatever next? Predictive brains, situated agents, and the future of  
904 cognitive science. *Behavioral and Brain Sciences* *36*, 181–204.

- 905 83. Mobarhan, M.H., Halmes, G., Martínez-Cañada, P., Hafting, T., Fyhn, M., and  
906 Einevoll, G.T. (2018). Firing-rate based network modeling of the dLGN circuit: Ef-  
907 fects of cortical feedback on spatiotemporal response properties of relay cells. *PLOS*  
908 *Computational Biology* *14*, e1006156.
- 909 84. Jahnsen, H. and Llinás, R. (1984). Voltage-dependent burst-to-tonic switching of tha-  
910 lamic cell activity: An in vitro study. *Archives Italiennes De Biologie* *122*, 73–82.
- 911 85. Dossi, R.C., Nuñez, A., and Steriade, M. (1992). Electrophysiology of a slow (0.5–4 Hz)  
912 intrinsic oscillation of cat thalamocortical neurones in vivo. *The Journal of Physiology*  
913 *447*, 215–234.
- 914 86. Mease, R.A., Krieger, P., and Groh, A. (2014). Cortical control of adaptation and  
915 sensory relay mode in the thalamus. *Proceedings of the National Academy of Sciences*  
916 *111*, 6798–6803.
- 917 87. Alitto, H., Rathbun, D.L., Vandekest, J.J., Alexander, P.C., and Usrey, W.M. (2019).  
918 The Augmentation of Retinogeniculate Communication during Thalamic Burst Mode.  
919 *Journal of Neuroscience* *39*, 5697–5710.
- 920 88. Swadlow, H.A. and Gusev, A.G. (2001). The impact of 'bursting' thalamic impulses at  
921 a neocortical synapse. *Nature Neuroscience* *4*, 402–408.
- 922 89. Guido, W., Lu, S.M., Vaughan, J.W., Godwin, D.W., and Sherman, S.M. (1995). Re-  
923 ceiver operating characteristic (ROC) analysis of neurons in the cat's lateral geniculate  
924 nucleus during tonic and burst response mode. *Visual Neuroscience* *12*, 723–741.
- 925 90. Mease, R.A., Kuner, T., Fairhall, A.L., and Groh, A. (2017). Multiplexed Spike Coding  
926 and Adaptation in the Thalamus. *Cell Reports* *19*, 1130–1140.
- 927 91. Guo, W., Clause, A.R., Barth-Maron, A., and Polley, D.B. (2017). A Corticothalamic  
928 Circuit for Dynamic Switching between Feature Detection and Discrimination. *Neuron*  
929 *95*, 180–194.e5.
- 930 92. Murata, Y. and Colonnese, M.T. (2018). Thalamus Controls Development and Expres-  
931 sion of Arousal States in Visual Cortex. *Journal of Neuroscience* *38*, 8772–8786.
- 932 93. Grubb, M.S. and Thompson, I.D. (2003). Quantitative Characterization of Visual Re-  
933 sponse Properties in the Mouse Dorsal Lateral Geniculate Nucleus. *Journal of Neuro-*  
934 *physiology* *90*, 3594–3607.
- 935 94. Rueden, C.T., Schindelin, J., Hiner, M.C., DeZonia, B.E., Walter, A.E., Arena, E.T.,  
936 and Eliceiri, K.W. (2017). ImageJ2: ImageJ for the next generation of scientific image  
937 data. *BMC Bioinformatics* *18*.
- 938 95. Schindelin, J., Arganda-Carreras, I., Frise, E., Kaynig, V., Longair, M., Pietzsch, T.,  
939 Preibisch, S., Rueden, C., Saalfeld, S., Schmid, B., et al. (2012). Fiji: An open-source  
940 platform for biological-image analysis. *Nature Methods* *9*, 676–682.

- 941 96. Poynton, C.A. (1998). Rehabilitation of gamma, in Human Vision and Electronic Imag-  
942 ing III, B.E. Rogowitz and T.N. Pappas, eds., volume 3299 (San Jose, CA: International  
943 Society for Optical Engineering), pp. 232–249.
- 944 97. Pachitariu, M., Steinmetz, N.A., Kadir, S.N., Carandini, M., and Harris, K.D. (2016).  
945 Fast and accurate spike sorting of high-channel count probes with KiloSort, in Advances  
946 in Neural Information Processing Systems 29, D.D. Lee, M. Sugiyama, U.V. Luxburg,  
947 I. Guyon, and R. Garnett, eds. (Curran Associates, Inc.), pp. 4448–4456.
- 948 98. Spacek, M.A., Blanche, T.J., and Swindale, N.V. (2009). Python for large-scale elec-  
949 trophysiology. *Front Neuroinform* 2, 9.
- 950 99. Swindale, N.V. and Spacek, M.A. (2014). Spike sorting for polytrodes: a divide and  
951 conquer approach. *Front Syst Neurosci* 8, 6.
- 952 100. Yatsenko, D., Walker, E.Y., and Tolias, A.S. (2018). DataJoint: A simpler relational  
953 data model. *arXiv 1807*, 11104.
- 954 101. Mitzdorf, U. (1985). Current source-density method and application in cat cerebral  
955 cortex: Investigation of evoked potentials and EEG phenomena. *Physiological Reviews*  
956 65, 37–100.
- 957 102. Heumann, D., Leuba, G., and Rabinowicz, T. (1977). Postnatal development of the  
958 mouse cerebral neocortex. II. Quantitative cytoarchitectonics of visual and auditory  
959 areas. *Journal Fur Hirnforschung* 18, 483–500.
- 960 103. van der Togt, C., Spekreijse, H., and Supèr, H. (2005). Neural responses in cat visual  
961 cortex reflect state changes in correlated activity. *European Journal of Neuroscience*  
962 22, 465–475.
- 963 104. Baden, T., Berens, P., Franke, K., Román Rosón, M., Bethge, M., and Euler, T.  
964 (01 2016/01/21/print). The functional diversity of retinal ganglion cells in the mouse.  
965 *Nature* 529, 345–350.
- 966 105. Bonhoeffer, T., Kim, D.S., Malonek, D., Shoham, D., and Grinvald, A. (1995). Optical  
967 Imaging of the Layout of Functional Domains in Area 17 and Across the Area 17/18  
968 Border in Cat Visual Cortex. *European Journal of Neuroscience* 7, 1973–1988.
- 969 106. Remtulla, S. and Hallett, P. (1985). A schematic eye for the mouse, and comparisons  
970 with the rat. *Vision research* 25, 21–31.
- 971 107. Gelman, A. and Hill, J. (2007). *Data Analysis Using Regression and Multi-*  
972 *level/Hierarchical Models, Analytical Methods for Social Research* (Cambridge ; New  
973 York: Cambridge University Press), oCLC: ocm67375137.
- 974 108. Aarts, E., Verhage, M., Veenvliet, J.V., Dolan, C.V., and van der Sluis, S. (2014). A  
975 solution to dependency: Using multilevel analysis to accommodate nested data. *Nature*  
976 *Neuroscience* 17, 491–496.

- 977 109. R Core Team (2017). R: A Language and Environment for Statistical Computing, R  
978 Foundation for Statistical Computing, Vienna, Austria.
- 979 110. Bates, D., Mächler, M., Bolker, B., and Walker, S. (2015). Fitting Linear Mixed-Effects  
980 Models Using **lme4**. *Journal of Statistical Software* 67.
- 981 111. Luke, S.G. (2017). Evaluating significance in linear mixed-effects models in R. *Behavior*  
982 *Research Methods* 49, 1494–1502.
- 983 112. Kuznetsova, A., Brockhoff, P.B., and Christensen, R.H.B. (2017). **lmerTest** Package:  
984 Tests in Linear Mixed Effects Models. *Journal of Statistical Software* 82.



985 Supplementary Information

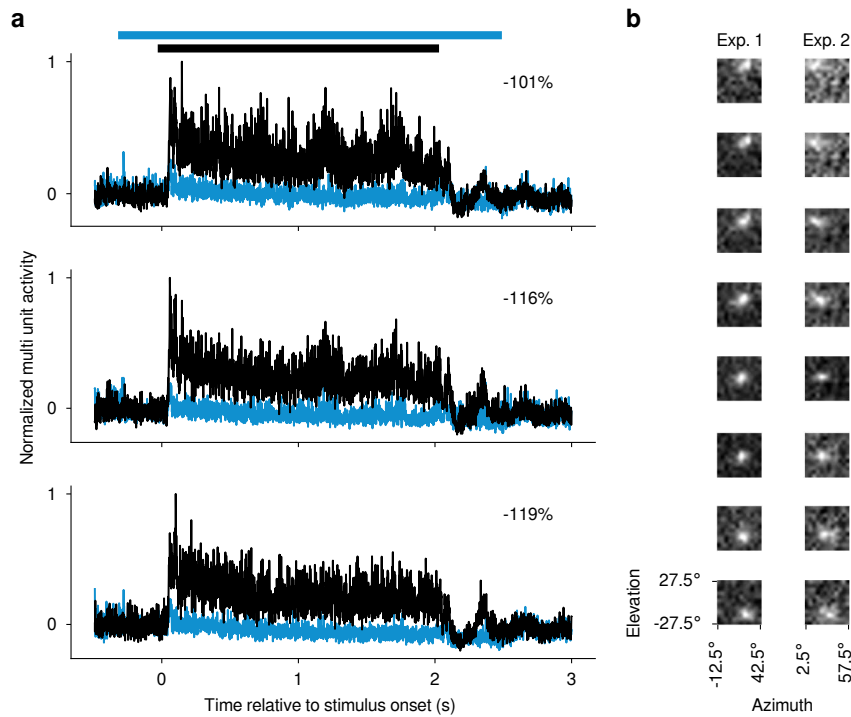

**Figure S1** Confirmation of optogenetic suppression of V1 responses and targeting dLGN for recordings. **(a)** MUAe responses [103] to 2 s drifting gratings recorded in one experiment for three example channels. All three channels were located, as determined by current source density analysis [101], in the infragranular layers of V1. *Black*: Mean MUAe responses across control trials; *blue*: MUAe responses in trials with optogenetic activation of PV+ inhibitory interneurons. Normalized MUAe was computed by subtracting the mean activity across both conditions in a 200 ms time window prior to light onset before normalizing to the maximum response across the two conditions. Percentages indicate mean reduction in MUAe over the stimulus presentation period. *Black bar*: stimulus period; *blue bar*: photoactivation period. **(b)** MUAe-based RFs for channels located in dLGN during two example RF mapping experiments. Each panel represents one channel, with the top channel being located most dorsally and the bottom channel most ventrally in the dLGN. RFs were computed as the mean response to a change in contrast at a given monitor position in a time window ranging from 50 ms after stimulus onset to 100 ms after stimulus offset. Brighter pixels indicate higher activity. The emerging characteristic pattern with more ventrally located channels representing locations lower in the visual field was used to confirm successful targeting of dLGN.

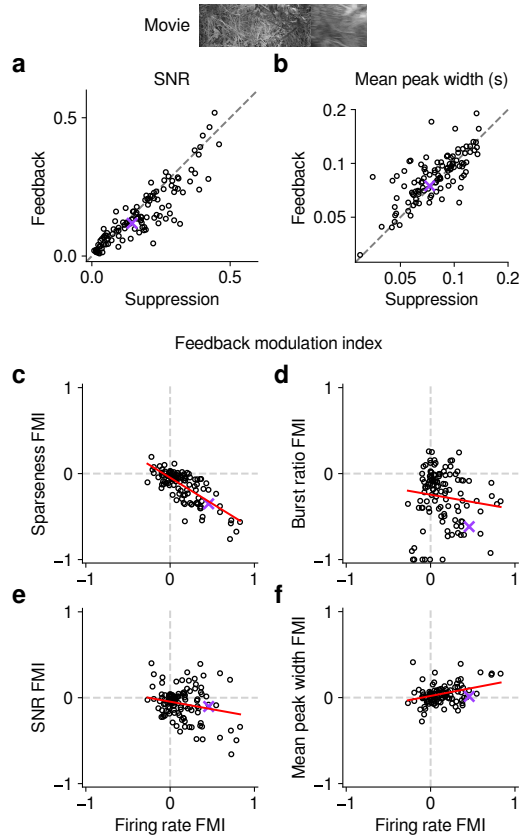

**Figure S2** Effects of CT feedback on additional parameters of responses to naturalistic movies and relationship with firing rate.

(a, b) Comparison of CT feedback vs. V1 suppression conditions for PSTH signal-to-noise ratio (SNR) (a) and mean peak width (b). SNR was computed as in [104], and compares the variance of the trial-averaged PSTH across time relative to the single-trial variance across time, averaged across stimulus repeats. If all trials are identical such that the PSTH is a perfect representation of the each trial's response, SNR equals 1. The width of PSTH peaks that exceeded a threshold amplitude was measured as the temporal separation of the middle 68% of spikes clustered as part of each peak (see Methods). Narrow peaks are a proxy for high temporal precision of responses. With CT feedback intact, mean SNR was lower (0.14 vs. 0.16, LMM:  $F_{1,154.7} = 14.72$ ,  $p = 0.00018$ ) and mean peak width was higher (0.086 vs. 0.080, LMM:  $F_{1,153} = 7.0$ ,  $p = 0.0088$ ). (c-f) Relationship between CT feedback effects (FMI) on firing rate and sparseness (c), burst ratio (d), SNR (e), and peak width (f). CT feedback-related changes in firing rate can to a large degree account for the changes in sparseness (LMM: slope of  $-0.60 \pm 0.11$ ; (c)). For all other measures, slopes were either non-significant or closer to 0 (Burst ratio, LMM: slope of  $-0.17 \pm 0.29$ ; SNR, LMM: slope of  $-0.18 \pm 0.18$ ; peak width, LMM: slope of  $0.19 \pm 0.11$ ).

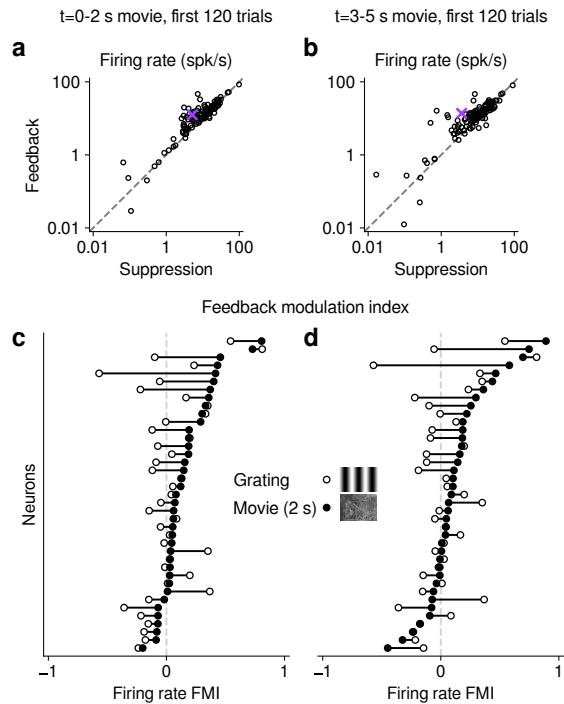

**Figure S3** Comparison of effects of V1 suppression for different parts of the naturalistic movie clips and for the first 120 trials only.

(a, b) In conditions with CT feedback intact, dLGN firing rates were consistently higher than during V1 suppression, both for the first 2 s (a) and the last 2 s (b) of the movie clips (main effect of feedback, LMM:  $F_{1,394.9} = 14.6$ ,  $p = 0.00015$ ), and the effect of V1 suppression was indistinguishable during the first two and the last two seconds of the movie clips (interaction feedback  $\times$  analysis window, LMM:  $F_{1,394.9} = 0.61$ ,  $p = 0.43$ ). Higher consistency of effects of V1 feedback suppression on firing rates to naturalistic movies thus cannot be explained by the longer duration of the movies (5 s) compared to gratings (2 s). (c, d) Comparison of feedback modulation index (FMI) of firing rates for gratings vs. movies, separately for the first 2 s (c) and the last 2 s (d) of the movie clips. Firing rate FMIs were significantly more positive for movies vs. gratings, even when considering only the first 2 s (mean FMI of 0.16 (movies) vs. 0.022 (gratings); LMM:  $F_{1,38} = 12.7$ ,  $p = 0.00099$ ) (c). Considering only the last 2 s of the movies (d) gave very similar results (mean FMI of 0.14 (movies) vs. 0.03 (gratings); LMM:  $F_{1,38} = 5.7$ ,  $p = 0.022$ ). Hence, even when we limited our analysis to the first 2 s of the movie clips, CT feedback effects remained stronger for movies than gratings. Together, these analyses show that considering the full 5 s of the movie clips does not inflate the difference in firing rate FMI between movies and gratings, but is rather a conservative estimate of the effect.

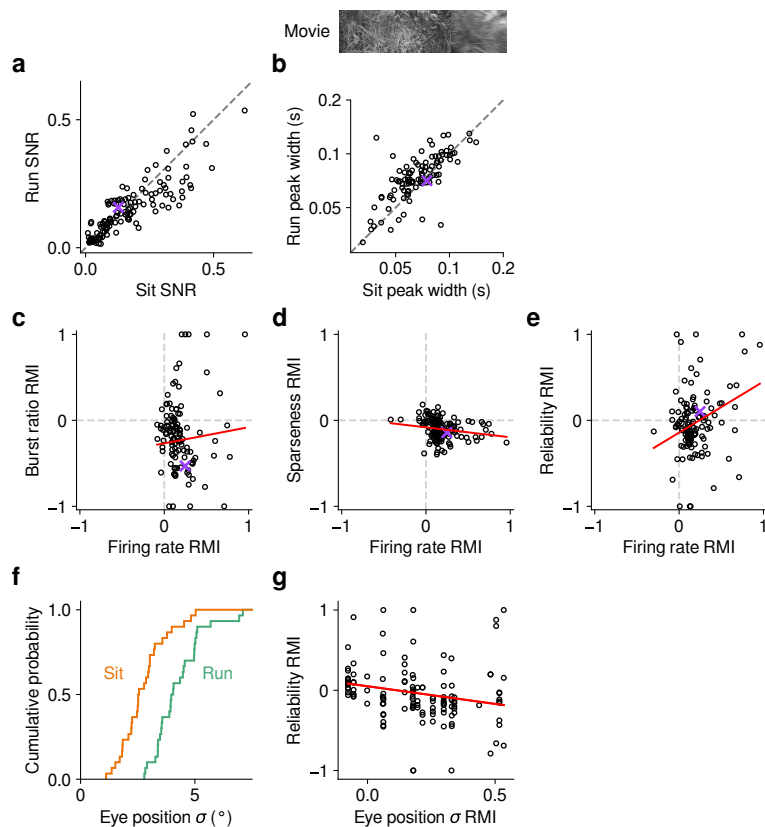

**Figure S4** Effects of locomotion on additional parameters of responses to naturalistic movie clips and relationship with firing rate.

(a,b) Comparison between trials with locomotion and stationary periods for (a) SNR [104] and (b) width of response peaks. During locomotion, SNR is lower (0.14 vs. 0.16, LMM:  $F_{1,190.4} = 4.9$ ,  $p = 0.029$ ) and peak width broader (0.075 vs. 0.068, LMM:  $F_{1,146.2} = 13.1$ ,  $p = 0.00040$ ). (c–e) Relationship between locomotion effects (RMI) on firing rate vs. burst ratio (c), sparseness (d), and reliability (e). Locomotion-related changes in firing rate can to some degree account for the changes in reliability (LMM: slope of  $0.59 \pm 0.38$ ; (e)). For all other measures, slopes were non-significant (Burst ratio, LMM: slope of  $0.19 \pm 0.43$ ; sparseness, LMM: slope of  $-0.12 \pm 0.12$ ). (f) Distribution of trial-averaged eye-position standard deviation for trials with locomotion (green) and stationary periods (orange). Eye-position standard deviation was first calculated for each time point across trials, and then averaged across time points. In line with previous reports [63, 67], standard deviation of eye position was, on average, larger during locomotion than during stationary periods ( $4.27^\circ$  vs.  $2.76^\circ$ , LMM:  $F_{1,49} = 53.65$ ,  $p = 2.1 \times 10^{-9}$ ,  $N = 30$  experiments from 6 mice). (g) Locomotion-related trial-to-trial reliability co-varied with locomotion-related changes in eye position standard deviation (LMM: slope of  $-0.44 \pm 0.36$ ); however, the expected difference in reliability RMI corresponding to a 1 standard deviation difference in eye position  $\sigma$  RMI is  $-0.081$ , which is much smaller than the residual standard deviation of 0.28 unexplained by the regression. Therefore, changes in eye position during locomotion cannot reliably account for the reduced reliability of responses during locomotion (Fig. 5f).

**Figure S5** Two example movies used for the recordings.
